# Supplementary material for: Transcriptome and Hormone Analyses Revealed Insights into Hormonal and Vesicle Trafficking Regulation among Olea europaea Fruit Tissues in Late Development
Source: PubMed Central journal article supplement (PMC7404322; doi:10.3390/ijms21144819), 2020-07-08
Supplement: ijms-21-04819-s001.pdf [file ijms-21-04819-s001.pdf]

**Transcriptome and hormone analyses revealed insights into hormonal and vesicle trafficking regulation between *Olea europaea* fruit tissues in late development**

Beatriz Briegas<sup>1</sup>, Jorge Corbacho<sup>1</sup>, Maria C. Parra-Lobato<sup>1</sup>, Miguel A. Paredes<sup>1</sup>, Juana Labrador<sup>1</sup>, Mercedes Gallardo<sup>2</sup> and Maria C. Gomez-Jimenez<sup>1\*</sup>

<sup>1</sup>University of Extremadura, Plant Physiology, Avda de Elvas s/n, 06006 Badajoz, Spain. <sup>2</sup>University of Vigo, Plant Physiology, Campus Lagoas-Marcosende, s/n, 36310 Vigo, Spain.

\*Correspondence: [mcgomez@unex.es](mailto:mcgomez@unex.es)

SUPPLEMENTARY MATERIAL

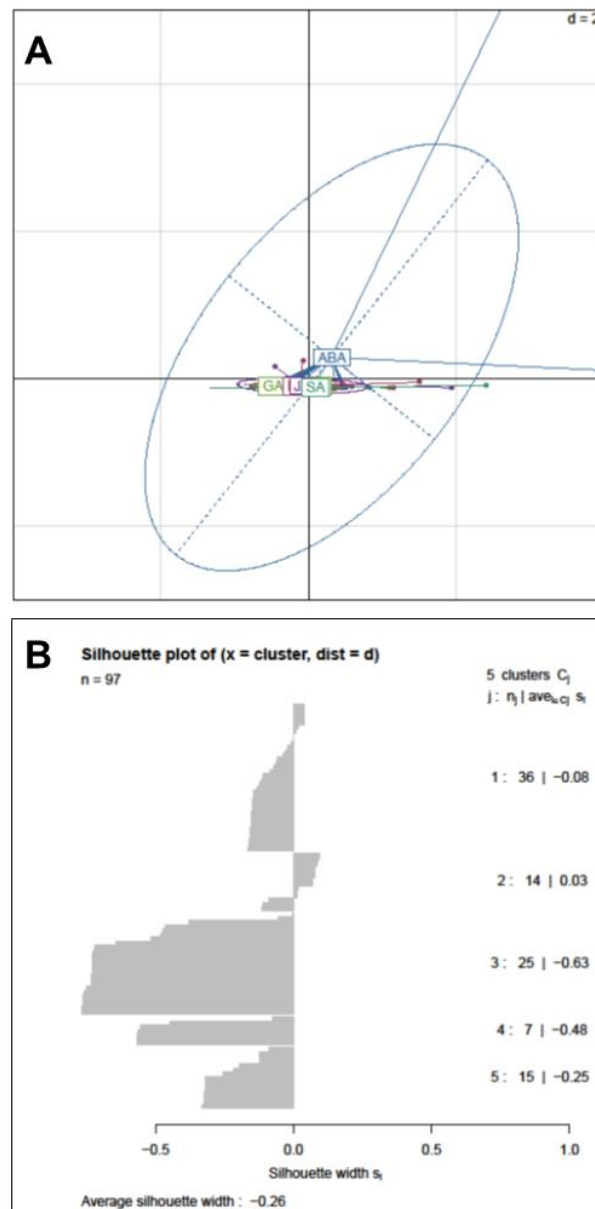

**Figure S1.** (A) Hierarchical Clustering Analysis (HCA) of differentially expressed genes related to hormone metabolism and signaling in the indicated groups (hormone levels) in olive AZ and fruit at the last fruit ripening. (B) Silhouette plot for gene-hormone relationships in AZ and fruit at last stage of fruit ripening.

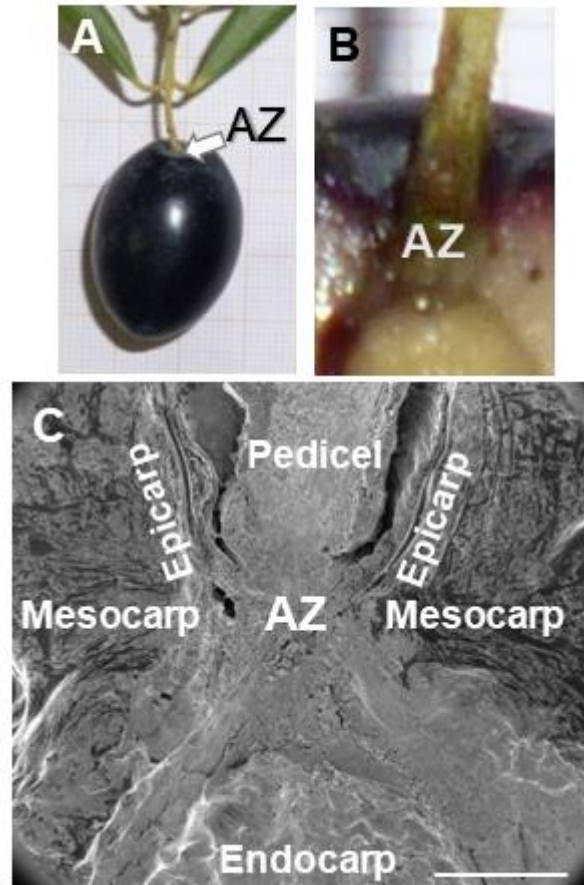

**Figure S2.** Tissues of olive (*Olea europaea* L. cv Picual) used for this study: AZ and pericarp (epicarp and mesocarp) of fruit at the last stage of ripening. (A) Image of olive ripe-fruit illustrating the location of the AZ between the peduncle (top) and fruit (bottom). (B) Longitudinal section of the transition zone between the peduncle (top) and fruit (bottom) showing the AZ of olive ripe-fruit. (C) Scanning electron micrograph of a longitudinal section of Picual fruit illustrating the position of the tissue samples used for this study: the fruit (epicarp and mesocarp) and their AZ at 217 DPA. Scale bar 1 mm.

**Table S1.** Fruit- or AZ-enriched genes encoding various cell-wall proteins at the last stage of olive fruit ripening. Sequences were selected after establishing a  $P < 0.01$ . The table shows the total read count in RPKMx1000 for each gene after normalization across the two samples: fruit-pericarp and their AZ at 217 DPA.

| Uniprot ID                                             | AZ      | Fruit   | P value   | Description                                                                  |
|--------------------------------------------------------|---------|---------|-----------|------------------------------------------------------------------------------|
| <b><math>\alpha</math>-galactosidase</b>               |         |         |           |                                                                              |
| <i>Enriched in fruit</i>                               |         |         |           |                                                                              |
| Q5DUH8                                                 | 2.00    | 26.19   | 2,27E-07  | Alpha galactosidase, gal1 = <i>Coffea arabica</i>                            |
| <b><math>\alpha</math>-1,4-glucan-protein synthase</b> |         |         |           |                                                                              |
| <i>Enriched in fruit</i>                               |         |         |           |                                                                              |
| Q2HV87                                                 | 0.00    | 150.81  | 2,70E-44  | Alpha-1,4-glucan-protein synthase (UDP-forming) = <i>Medicago truncatula</i> |
| <i>Enriched in AZ</i>                                  |         |         |           |                                                                              |
| B9RAC8                                                 | 83.00   | 54.32   | 2,41E-03  | Alpha-1,4-glucan-protein synthase [UDP-forming] = <i>Ricinus communis</i>    |
| <b><math>\alpha</math>-glucosidase</b>                 |         |         |           |                                                                              |
| <i>Enriched in fruit</i>                               |         |         |           |                                                                              |
| B9STU2                                                 | 0.00    | 3.97    | 9,77E-04  | Neutral alpha-glucosidase ab = <i>Ricinus communis</i>                       |
| <i>Enriched in AZ</i>                                  |         |         |           |                                                                              |
| Q9LEC9                                                 | 12.00   | 0.00    | 2,91E-11  | Alpha-glucosidase, mal2 = <i>Solanum tuberosum</i>                           |
| <b>arabinogalactan protein</b>                         |         |         |           |                                                                              |
| <i>Enriched in AZ</i>                                  |         |         |           |                                                                              |
| Q8LCE4                                                 | 22.56   | 0.00    | 1,95E-03  | Classical arabinogalactan protein 5, AGP5, At1g35230                         |
| <b><math>\beta</math>-1,3-glucanase</b>                |         |         |           |                                                                              |
| <i>Enriched in fruit</i>                               |         |         |           |                                                                              |
| Q9FXL4                                                 | 0.00    | 642.39  | 8,53E-252 | Elicitor inducible beta-1,3-glucanase NtEIG-E76 = <i>Nicotiana tabacum</i>   |
| <i>Enriched in AZ</i>                                  |         |         |           |                                                                              |
| Q68V46                                                 | 1350.00 | 0.00    | 0,00E+00  | Beta-1,3-glucanase, glu-4 = <i>Olea europaea</i>                             |
| B9RSS2                                                 | 42.00   | 0.00    | 9,31E-10  | Endo-1,3-1,4-beta-d-glucanase = <i>Ricinus communis</i>                      |
| B9SCU1                                                 | 94.00   | 11.13   | 5,10E-22  | Glucan endo-1,3-beta-glucosidase = <i>Ricinus communis</i>                   |
| <b><math>\beta</math>-galactosidase</b>                |         |         |           |                                                                              |
| <i>Enriched in fruit</i>                               |         |         |           |                                                                              |
| O81100                                                 | 0.00    | 27.16   | 6,94E-18  | Beta-galactosidase, TBG4 = <i>Solanum lycopersicum</i>                       |
| <i>Enriched in AZ</i>                                  |         |         |           |                                                                              |
| O65736                                                 | 25.00   | 0.00    | 1,39E-17  | Beta-galactosidase = <i>Cicer arietinum</i>                                  |
| B9N0S6                                                 | 3.00    | 0.00    | 7,81E-03  | Beta-galactosidase = <i>Populus trichocarpa</i>                              |
| <b><math>\beta</math>-glucosidase</b>                  |         |         |           |                                                                              |
| <i>Enriched in fruit</i>                               |         |         |           |                                                                              |
| Q8GVD0                                                 | 215.00  | 5033.87 | 0,00E+00  | Beta-glucosidase, bglc = <i>Olea europaea</i>                                |
| <i>Enriched in AZ</i>                                  |         |         |           |                                                                              |
| O82151                                                 | 59.00   | 0.00    | 4,81E-35  | Beta-D-glucan exohydrolase = <i>Nicotiana tabacum</i>                        |
| <b><math>\beta</math>-hexosaminidase</b>               |         |         |           |                                                                              |
| <i>Enriched in fruit</i>                               |         |         |           |                                                                              |
| D3TI69                                                 | 0.00    | 27.24   | 2,84E-14  | Beta-hexosaminidase 1 = <i>Solanum lycopersicum</i>                          |
| <b>Cellulase</b>                                       |         |         |           |                                                                              |
| <i>Enriched in fruit</i>                               |         |         |           |                                                                              |
| Q9XF22                                                 | 0.00    | 6.23    | 3,91E-03  | Cellulase = <i>Nicotiana alata</i>                                           |
| <i>Enriched in AZ</i>                                  |         |         |           |                                                                              |
| Q43149                                                 | 20.00   | 0.00    | 9,31E-10  | Cellulase = <i>Sambucus nigra</i>                                            |
| <b>cellulose synthase</b>                              |         |         |           |                                                                              |

|                             |        |         |           |                                                                         |
|-----------------------------|--------|---------|-----------|-------------------------------------------------------------------------|
| <i>Enriched in fruit</i>    |        |         |           |                                                                         |
| B9IKV7                      | 0.00   | 46.74   | 8,35E-43  | Cellulose synthase = <i>Populus trichocarpa</i>                         |
| B9S9V9                      | 4.00   | 24.16   | 1,05E-10  | Cellulose synthase = <i>Ricinus communis</i>                            |
| D7U7F7                      | 0.00   | 6.06    | 4,88E-04  | Cellulose synthase = <i>Vitis vinifera</i>                              |
| B9GFE1                      | 0.00   | 12.33   | 3,64E-12  | Cellulose synthase = <i>Populus trichocarpa</i>                         |
| D7T308                      | 0.00   | 11.84   | 2,33E-10  | Cellulose synthase = <i>Vitis vinifera</i>                              |
| <i>Enriched in AZ</i>       |        |         |           |                                                                         |
| Q6XP47                      | 13.00  | 0.00    | 9,09E-13  | Cellulose synthase, StCesA1 = <i>Solanum tuberosum</i>                  |
| C6KF43                      | 11.00  | 0.00    | 2,38E-07  | Cellulose synthase catalytic subunit, cesA7 = <i>Gossypium hirsutum</i> |
| Q4PKB6                      | 5.00   | 0.00    | 6,10E-05  | Cellulose synthase CesA1 = <i>Boehmeria nivea</i>                       |
| Q45KQ0                      | 26.00  | 0.00    | 1,73E-18  | Cellulose synthase-like protein CslE = <i>Nicotiana tabacum</i>         |
| Q3Y6V1                      | 14.00  | 0.00    | 4,66E-10  | Cellulose synthase-like protein CslG = <i>Nicotiana tabacum</i>         |
| B9I7Q4                      | 12.00  | 0.00    | 9,09E-13  | Cellulose synthase = <i>Populus trichocarpa</i>                         |
| B9RYN4                      | 3.00   | 0.00    | 7,81E-03  | Cellulose synthase = <i>Ricinus communis</i>                            |
| D7T7B9                      | 6.00   | 0.00    | 7,81E-03  | Cellulose synthase = <i>Vitis vinifera</i>                              |
| D7THX8                      | 11.00  | 0.00    | 1,14E-13  | Cellulose synthase = <i>Vitis vinifera</i>                              |
| D7SUS1                      | 5.00   | 0.00    | 1,22E-04  | Cellulose synthase = <i>Vitis vinifera</i>                              |
| <b>chitinase</b>            |        |         |           |                                                                         |
| <i>Enriched in fruit</i>    |        |         |           |                                                                         |
| A5B1C7                      | 25.00  | 71.65   | 3,67E-05  | Chitinase = <i>Vitis vinifera</i>                                       |
| D7T2C4                      | 19.00  | 113.28  | 1,81E-14  | Chitinase = <i>Vitis vinifera</i>                                       |
| <i>Enriched in AZ</i>       |        |         |           |                                                                         |
| Q9FS45                      | 134.00 | 10.25   | 5,46E-30  | Chitinase = <i>Vitis vinifera</i>                                       |
| A1IJ67                      | 10.00  | 0.00    | 3,91E-03  | Class IV chitinase = <i>Nicotiana tabacum</i>                           |
| D7SSZ8                      | 350.00 | 0.00    | 1,92E-93  | Chitinase = <i>Vitis vinifera</i>                                       |
| <b>endo-1,4-β-glucanase</b> |        |         |           |                                                                         |
| <i>Enriched in fruit</i>    |        |         |           |                                                                         |
| Q9ZSP9                      | 0.00   | 20.80   | 7,28E-12  | Endo-beta-1,4-D-glucanase, Cel8 = <i>Solanum lycopersicum</i>           |
| B9S075                      | 103.00 | 146.00  | 4,49E-03  | Endo-1,4-beta-glucanase = <i>Ricinus communis</i>                       |
| <i>Enriched in AZ</i>       |        |         |           |                                                                         |
| B9RLZ9                      | 4.00   | 0.00    | 7,81E-03  | Endo-1,4-beta-glucanase = <i>Ricinus communis</i>                       |
| Q0KIX2                      | 68.00  | 0.00    | 3,67E-40  | Endoglucanase, CmEGase1 = <i>Cucumis melo</i>                           |
| <b>endo-β-mannanase</b>     |        |         |           |                                                                         |
| <i>Enriched in AZ</i>       |        |         |           |                                                                         |
| C7A7X6                      | 44.00  | 18.47   | 8,72E-05  | Endo-beta-mannanase, MAN1 = <i>Actinidia arguta</i>                     |
| <b>expansin</b>             |        |         |           |                                                                         |
| <i>Enriched in fruit</i>    |        |         |           |                                                                         |
| Q9ZP37                      | 0.00   | 232.00  | 7,35E-51  | Alpha-expansin, Nt-EXPA3 = <i>Nicotiana tabacum</i>                     |
| B9R8E5                      | 0.00   | 457.03  | 1,31E-98  | Alpha-expansin 11 = <i>Ricinus communis</i>                             |
| Q9M5I7                      | 132.00 | 658.56  | 4,56E-56  | Alpha-expansin 3 = <i>Triphysaria versicolor</i>                        |
| B9S4E4                      | 0.00   | 2111.11 | 0,00E+00  | Alpha-expansin 8 = <i>Ricinus communis</i>                              |
| Q84UT0                      | 0.00   | 247.96  | 4,70E-52  | Expansin, Vexp-1 = <i>Vitis vinifera</i>                                |
| B7U8J4                      | 52.00  | 1418.63 | 1,22E-244 | Expansin, CDK3 = <i>Diospyros kaki</i>                                  |
| A5BA94                      | 0.00   | 120.83  | 5,17E-26  | Expansin = <i>Vitis vinifera</i>                                        |
| <i>Enriched in AZ</i>       |        |         |           |                                                                         |
| B9IGR9                      | 10.00  | 0.00    | 3,91E-03  | PtEXPA13 = <i>Populus trichocarpa</i>                                   |
| <b>extensin</b>             |        |         |           |                                                                         |
| <i>Enriched in fruit</i>    |        |         |           |                                                                         |
| Q39600                      | 0.00   | 216.58  | 7,98E-40  | Extensin, cyc17 = <i>Catharanthus roseus</i>                            |

|                                                  |        |        |           |                                                                                               |
|--------------------------------------------------|--------|--------|-----------|-----------------------------------------------------------------------------------------------|
| P13983                                           | 0.00   | 213.97 | 2,39E-112 | Extensin, HRGPNT3 = <i>Nicotiana tabacum</i>                                                  |
| B9RPC0                                           | 9.29   | 41.51  | 3,64E-08  | leucine-rich repeat family protein / extensin family protein LRX1 = <i>Ricinus communis</i>   |
| <i>Enriched in AZ</i>                            |        |        |           |                                                                                               |
| C3VPW8                                           | 9.00   | 0.00   | 7,81E-03  | Extensin = <i>Lithospermum erythrorhizon</i>                                                  |
| <b>glycosyl hydrolase</b>                        |        |        |           |                                                                                               |
| <i>Enriched in fruit</i>                         |        |        |           |                                                                                               |
| D7U290                                           | 0.00   | 2.71   | 7,81E-03  | Glycosyl hydrolase 1 family protein = <i>Vitis vinifera</i>                                   |
| <i>Enriched in AZ</i>                            |        |        |           |                                                                                               |
| B9HAA3                                           | 32.00  | 0.00   | 1,16E-10  | Glycosyl hydrolase 17 family = <i>Populus trichocarpa</i>                                     |
| D7TQ09                                           | 19.00  | 4.08   | 1,17E-04  | Glycosyl hydrolase 17 family = <i>Populus trichocarpa</i>                                     |
| B9GQH4                                           | 10.00  | 0.00   | 1,95E-03  | Glycosyl hydrolase 18 family protein = <i>Populus trichocarpa</i>                             |
| B9HYK4                                           | 404.00 | 39.21  | 8,46E-70  | Glycosyl hydrolase 18 family protein = <i>Populus trichocarpa</i>                             |
| A5BD25                                           | 4.00   | 0.00   | 7,81E-03  | Glycosyl hydrolase 18 family protein = <i>Vitis vinifera</i>                                  |
| D7U285                                           | 120.00 | 58.68  | 2,47E-11  | Glycosyl hydrolase 1 family protein = <i>Vitis vinifera</i>                                   |
| D7U288                                           | 8.00   | 0.00   | 9,54E-07  | Glycosyl hydrolase 1 family protein = <i>Vitis vinifera</i>                                   |
| <b>laccase</b>                                   |        |        |           |                                                                                               |
| <i>Enriched in AZ</i>                            |        |        |           |                                                                                               |
| B2M153                                           | 518.00 | 0.00   | 4,51E-277 | Laccase = <i>Rosa hybrid cultivar</i>                                                         |
| B9H7Z9                                           | 170.00 | 35.39  | 9,82E-42  | Laccase = <i>Populus trichocarpa</i>                                                          |
| B9IEA5                                           | 14.00  | 0.00   | 2,98E-08  | Laccase = <i>Populus trichocarpa</i>                                                          |
| <b>lyase</b>                                     |        |        |           |                                                                                               |
| <i>Enriched in AZ</i>                            |        |        |           |                                                                                               |
| B9SMY4                                           | 31.00  | 0.00   | 8,67E-19  | Lyase = <i>Ricinus communis</i>                                                               |
| B9SMM6                                           | 156.00 | 0.00   | 4,91E-91  | Lyase = <i>Ricinus communis</i>                                                               |
| B9SML0                                           | 215.00 | 0.00   | 6,88E-136 | Lyase = <i>Ricinus communis</i>                                                               |
| <b>pectin methylesterase/ Pectinesterase</b>     |        |        |           |                                                                                               |
| <i>Enriched in fruit</i>                         |        |        |           |                                                                                               |
| Q84V57                                           | 0.00   | 368.45 | 1,16E-180 | Pectinesterase = <i>Nicotiana benthamiana</i>                                                 |
| B9H3W4                                           | 0.00   | 9.49   | 3,91E-03  | Pectinesterase = <i>Populus trichocarpa</i>                                                   |
| D7SXF6                                           | 0.00   | 8.43   | 7,81E-03  | Pectinesterase = <i>Vitis vinifera</i>                                                        |
| P09607                                           | 0.00   | 24.84  | 1,82E-12  | Pectinesterase 2.1 (PE 2.1) (Pectin methylesterase 2.1), PME2.1 = <i>Solanum lycopersicum</i> |
| <i>Enriched in AZ</i>                            |        |        |           |                                                                                               |
| A0ZNK0                                           | 10.00  | 0.00   | 7,63E-06  | Pectin methylesterase 2, PcPME2 = <i>Pyrus communis</i>                                       |
| B9SP63                                           | 4.00   | 0.00   | 7,81E-03  | Pectinesterase = <i>Ricinus communis</i>                                                      |
| B9RD90                                           | 8.00   | 0.00   | 2,44E-04  | Pectinesterase = <i>Ricinus communis</i>                                                      |
| <b>polygalacturonase</b>                         |        |        |           |                                                                                               |
| <i>Enriched in fruit</i>                         |        |        |           |                                                                                               |
| D7U2D3                                           | 2.00   | 67.78  | 2,38E-23  | Polygalacturonase = <i>Vitis vinifera</i>                                                     |
| D7U2D3                                           | 2.00   | 67.78  | 2,38E-23  | Polygalacturonase = <i>Vitis vinifera</i>                                                     |
| <i>Enriched in AZ</i>                            |        |        |           |                                                                                               |
| B9RCG6                                           | 24.00  | 0.00   | 2,91E-11  | Polygalacturonase = <i>Ricinus communis</i>                                                   |
| B1PK08                                           | 616.00 | 114.23 | 3,23E-100 | Polygalacturonase = <i>Olea europaea</i>                                                      |
| A7PZL3                                           | 10.00  | 0.00   | 3,05E-05  | Polygalacturonase = <i>Vitis vinifera</i>                                                     |
| <b>ramnose synthase</b>                          |        |        |           |                                                                                               |
| <i>Enriched in AZ</i>                            |        |        |           |                                                                                               |
| Q9SYM5                                           | 206.78 | 84.21  | 6,03E-30  | Probable rhamnose biosynthetic enzyme, RHM1, At1g78570                                        |
| <b>xyloglucan endotransglucosylase/hydrolase</b> |        |        |           |                                                                                               |
| <i>Enriched in AZ</i>                            |        |        |           |                                                                                               |
| Q6EJD2                                           | 72.00  | 0.00   | 2,17E-19  | Xyloglucan endotransglucosylase, XTH-1 = <i>Beta vulgaris</i>                                 |

|                                            |        |       |          |                                                                           |
|--------------------------------------------|--------|-------|----------|---------------------------------------------------------------------------|
| C0IRH3                                     | 105.00 | 38.01 | 5,79E-10 | Xyloglucan endotransglucosylase/hydrolase 14 = <i>Actinidia deliciosa</i> |
| C0IRG4                                     | 80.00  | 0.00  | 2,12E-22 | Xyloglucan endotransglucosylase/hydrolase 5 = <i>Actinidia deliciosa</i>  |
| <b>xyloglucan:xyloglucosyl transferase</b> |        |       |          |                                                                           |
| <i>Enriched in AZ</i>                      |        |       |          |                                                                           |
| B9HAM2                                     | 25.00  | 0.00  | 9,54E-07 | Xyloglucan:xyloglucosyl transferase = <i>Populus trichocarpa</i>          |
| A5BND5                                     | 94.00  | 0.00  | 2,58E-26 | Xyloglucan:xyloglucosyl transferase = <i>Vitis vinifera</i>               |

**Table S2.** Fruit- or AZ-enriched genes encoding various plant-hormone metabolism and signaling proteins at the last stage of olive fruit ripening. Sequences were selected after establishing a  $P < 0.01$ . The table shows the total read count in RPKMx1000 for each gene after normalization across the two samples: fruit-pericarp and their AZ at 217 DPA.

| Uniprot ID               | AZ      | Fruit   | P value  | Description                                                                                                                                                                                                        |
|--------------------------|---------|---------|----------|--------------------------------------------------------------------------------------------------------------------------------------------------------------------------------------------------------------------|
| <b>Ethylene</b>          |         |         |          |                                                                                                                                                                                                                    |
| <i>Enriched in fruit</i> |         |         |          |                                                                                                                                                                                                                    |
| C6KMJ4                   | 1423.76 | 4795.00 | 0.00E+00 | ACC oxidase, ACO1 = <i>Boea hygrometrica</i>                                                                                                                                                                       |
| A1E4D3                   | 13.51   | 611.00  | 0.00E+00 | Ethylene receptor, ETR1 = <i>Coffea canephora</i>                                                                                                                                                                  |
| Q2PQJ0                   | 0.00    | 68.00   | 2.46E-38 | EIN3-binding F-box protein 1 (EIN3-binding F-box protein 2), EBF2 EBF1 = <i>Solanum lycopersicum</i>                                                                                                               |
| Q39026                   | 0.00    | 45.00   | 4.44E-16 | Mitogen-activated protein kinase 6 (AtMPK6), MPK6 At2g43790 F18O19.10                                                                                                                                              |
| O48631                   | 0.00    | 29.00   | 1.86E-09 | Ethylene-forming-enzyme-like dioxygenase = <i>Prunus armeniaca</i>                                                                                                                                                 |
| Q8GTL5                   | 0.00    | 10.00   | 2.44E-04 | S-adenosylmethionine synthase (AdoMet synthase) (Methionine adenosyltransferase) (MAT), SAMS = <i>Carica papaya</i>                                                                                                |
| Q9SXS8                   | 100.74  | 169.00  | 4.60E-03 | Ethylene-responsive transcription factor 3 (Ethylene-responsive element-binding factor 3 homolog) (Ethylene-responsive element-binding factor 5) (EREBP-5) (NtERF5), ERF3 ERF-5 ERF5 = <i>Nicotiana tabacum</i>    |
| <i>Enriched in AZ</i>    |         |         |          |                                                                                                                                                                                                                    |
| Q5IWL7                   | 319.17  | 0.00    | 1.73E-77 | Ethylene-responsive element binding protein 5 = <i>Nicotiana tabacum</i>                                                                                                                                           |
| Q84QD4                   | 166.12  | 18.00   | 3.87E-62 | EIL1 = <i>Nicotiana tabacum</i>                                                                                                                                                                                    |
| A7Q0V4                   | 326.51  | 70.00   | 3.00E-53 | S-adenosylmethionine synthase 5 (AdoMet synthase 5) (Methionine adenosyltransferase 5) (MAT 5), METK5 = <i>Vitis vinifera</i>                                                                                      |
| Q9SFB0                   | 91.25   | 0.00    | 2.80E-45 | MATE efflux family protein FRD3 (MATE citrate transporter) (Protein DTX43) (Protein FERRIC REDUCTASE DEFECTIVE 3) (AtFRD3) (Protein MANGANESE ACCUMULATOR 1), FRD3 DTX43 MAN1 At3g08040 F17A17.38 T8G24.8          |
| Q2PQJ1                   | 79.01   | 2.00    | 6.88E-44 | EIN3-binding F-box protein 1 (EIN3-binding F-box protein 2), EBF1 EBF2 = <i>Solanum lycopersicum</i>                                                                                                               |
| Q9FHW7                   | 608.18  | 207.00  | 5.50E-29 | SKP1-like protein 1B (SKP1-like 2) (UFO-binding protein 2), SKP1B ASK2 UIP2 At5g42190 MJC20.30                                                                                                                     |
| Q38950                   | 256.67  | 111.00  | 2.31E-29 | Serine/threonine-protein phosphatase 2A 65 kDa regulatory subunit A beta isoform (AtA beta) (PP2A subunit A. beta isoform), PP2AA2 DF1 At3g25800 K13N2.14                                                          |
| Q6R567                   | 133.59  | 11.00   | 1.49E-23 | E3 ubiquitin-protein ligase RMA1H1 (EC 6.3.2.-) (Protein RING membrane-anchor 1 homolog 1), RMA1H1 = <i>Capsicum annuum</i>                                                                                        |
| P31237                   | 66.87   | 0.00    | 1.36E-20 | 1-aminocyclopropane-1-carboxylate oxidase (ACC oxidase), ACO = <i>Actinidia deliciosa</i>                                                                                                                          |
| A9P822                   | 242.34  | 105.00  | 3.08E-19 | S-adenosylmethionine synthase 1 (AdoMet synthase 1) (Methionine adenosyltransferase 1) (MAT 1), METK1 = <i>Populus trichocarpa</i>                                                                                 |
| Q9LW49                   | 83.70   | 0.00    | 3.47E-18 | Ethylene-responsive transcription factor 4 (Ethylene-responsive element-binding factor 3) (EREBP-3) (Ethylene-responsive element-binding factor 4 homolog) (NsERF3), ERF4 ERF-3 ERF3 = <i>Nicotiana sylvestris</i> |

|                          |        |         |          |                                                                                                                                                                                                                                                         |
|--------------------------|--------|---------|----------|---------------------------------------------------------------------------------------------------------------------------------------------------------------------------------------------------------------------------------------------------------|
| Q32W74                   | 56.76  | 0.00    | 3.55E-15 | Ethylene responsive element binding protein C2 = <i>Capsicum annuum</i>                                                                                                                                                                                 |
| Q9S JL8                  | 343.58 | 215.00  | 1.59E-12 | S-adenosylmethionine synthase 3 (AdoMet synthase 3) (Methionine adenosyltransferase 3) (MAT 3), METK3 At2g36880 T1J8.6                                                                                                                                  |
| B9HK87                   | 15.47  | 0.00    | 3.73E-09 | Ethylene-insensitive 3d, EIN3D = <i>Populus trichocarpa</i>                                                                                                                                                                                             |
| D8VD38                   | 35.15  | 0.00    | 1.86E-09 | Ethylene response factor 11, ERF11 = <i>Actinidia deliciosa</i>                                                                                                                                                                                         |
| B9S1K1                   | 35.26  | 7.00    | 3.54E-09 | S-adenosylmethionine-dependent methyltransferase = <i>Ricinus communis</i>                                                                                                                                                                              |
| Q9XET8                   | 9.63   | 0.00    | 2.38E-07 | Ethylene receptor (Ethylene receptor homolog) ETR4 = <i>Solanum lycopersicum</i>                                                                                                                                                                        |
| Q39227                   | 21.23  | 0.00    | 1.19E-07 | 24-methylenesterol C-methyltransferase 2 (24-sterol C-methyltransferase 2) (Sterol-C-methyltransferase 2) (EC 2.1.1.143) (Protein COTYLEDON VASCULAR PATTERN 1), SMT2 CVP1 At1g20330 F14O10.7                                                           |
| B3FIB0                   | 13.30  | 0.00    | 1.91E-06 | Ethylene receptor ETR2 = <i>Actinidia deliciosa</i>                                                                                                                                                                                                     |
| Q6V397                   | 4.58   | 0.00    | 3.81E-06 | EIN2 = <i>Petunia hybrida</i>                                                                                                                                                                                                                           |
| O22587                   | 6.99   | 0.00    | 1.53E-05 | Ethylene receptor homolog, NTHK1 = <i>Nicotiana tabacum</i>                                                                                                                                                                                             |
| A6ZI64                   | 110.63 | 52.00   | 1.96E-05 | Putative ethylene-responsive element binding protein = <i>Salvia miltiorrhiza</i>                                                                                                                                                                       |
| P28186                   | 310.18 | 231.00  | 4.28E-04 | Ras-related protein ARA-3, ARA-3 At3g46060 F12M12_30                                                                                                                                                                                                    |
| Q6RJ36                   | 14.10  | 0.00    | 4.88E-04 | Ethylene responsive factor 2 (Ethylene-binding protein), ERF2 = <i>Solanum lycopersicum</i>                                                                                                                                                             |
| Q9SHE7                   | 115.38 | 53.00   | 4.52E-04 | Ubiquitin-NEDD8-like protein RUB1 [Cleaved into: Ubiquitin; NEDD8-like protein RUB1 (Ubiquitin-related protein 1) (AtRUB1)], RUB1 NEDD8 UBQ15 At1g31340 T19E23.13                                                                                       |
| Q8W231                   | 7.05   | 0.00    | 4.88E-04 | Putative serine/threonine-specific protein kinase, CTR1 = <i>Pyrus communis</i>                                                                                                                                                                         |
| Q6V398                   | 5.16   | 0.00    | 9.77E-04 | EIL1 = <i>Petunia hybrida</i>                                                                                                                                                                                                                           |
| O22174                   | 17.04  | 0.00    | 1.95E-03 | Ethylene-responsive transcription factor ERF008, ERF008 At2g23340 T20D16.3                                                                                                                                                                              |
| Auxin                    |        |         |          |                                                                                                                                                                                                                                                         |
| <i>Enriched in fruit</i> |        |         |          |                                                                                                                                                                                                                                                         |
| Q940X7                   | 172.31 | 1565.00 | 3.56E-91 | RING-box protein 1a (At-Rbx1;1) (Protein RING of cullins 1) (RBX1-2) (RBX1a-At), RBX1A ROC1 At5g20570 F7C8.160                                                                                                                                          |
| P31414                   | 0.00   | 16.00   | 2.91E-11 | Pyrophosphate-energized vacuolar membrane proton pump 1 (Pyrophosphate-energized inorganic pyrophosphatase 1) (H <sup>+</sup> )-PPase 1) (Vacuolar proton pyrophosphatase 1) (Vacuolar proton pyrophosphatase 3) = AVP1 AVP AVP-3 AVP3 At1g15690 F7H2.3 |
| B9RUW0                   | 0.00   | 51.00   | 2.33E-10 | Auxin-responsive protein IAA1 = <i>Ricinus communis</i>                                                                                                                                                                                                 |
| Q5ZF70                   | 0.00   | 35.00   | 1.19E-07 | Auxin resistance protein, axr2 = <i>Plantago major</i>                                                                                                                                                                                                  |
| D1MWZ6                   | 69.44  | 228.00  | 4.33E-07 | Auxin-repressed protein, CitAuR = <i>Citrullus lanatus</i>                                                                                                                                                                                              |
| B9H0Z6                   | 0.00   | 64.00   | 1.91E-06 | SAUR family protein, SAUR29 = <i>Populus trichocarpa</i>                                                                                                                                                                                                |
| D7M6D2                   | 0.00   | 12.00   | 6.10E-05 | Auxin efflux carrier family protein, ARALYDRAFT_486870                                                                                                                                                                                                  |
| Q9LTX2                   | 0.00   | 6.00    | 9.77E-04 | Transport inhibitor response 1-like protein (TIR1-like protein), At5g49980 K9P8.12                                                                                                                                                                      |
| Q9XEY3                   | 18.15  | 54.00   | 3.66E-03 | Nt-iaa4.3 deduced protein = <i>Nicotiana tabacum</i>                                                                                                                                                                                                    |
| <i>Enriched in AZ</i>    |        |         |          |                                                                                                                                                                                                                                                         |
| O04951                   | 277.95 | 0.00    | 3.37E-80 | Serine/threonine-protein phosphatase PP2A-5 catalytic subunit (Protein phosphatase 2A isoform 5), PP2A5 At1g69960 F20P5.30 T17F3.1                                                                                                                      |
| B9HCL2                   | 85.41  | 0.00    | 1.18E-38 | Auxin influx carrier component, PtrAUX1 = <i>Populus trichocarpa</i>                                                                                                                                                                                    |
| D9ZIM5                   | 148.34 | 15.00   | 5.73E-35 | ARF domain class transcription factor, IAA1 = <i>Malus domestica</i>                                                                                                                                                                                    |
| B9H216                   | 58.72  | 0.00    | 2.47E-32 | F-box family protein, FBL5 = <i>Populus trichocarpa</i>                                                                                                                                                                                                 |
| Q9FHW7                   | 608.18 | 207.00  | 5.50E-29 | SKP1-like protein 1B (SKP1-like 2) (UFO-binding protein 2), SKP1B ASK2 UIP2 At5g42190 MJC20.30                                                                                                                                                          |
| P46423                   | 196.54 | 20.00   | 6.29E-26 | Glutathione S-transferase (EC 2.5.1.18) (25 kDa auxin-binding protein) (GST class-phi) = <i>Hyoscyamus muticus</i>                                                                                                                                      |
| A5C819                   | 39.24  | 0.00    | 2.65E-23 | Putative uncharacterized protein = <i>Vitis vinifera</i>                                                                                                                                                                                                |
| B9IGX9                   | 82.93  | 19.00   | 4.48E-15 | Auxin efflux carrier component. auxin transport protein = <i>Populus trichocarpa</i>                                                                                                                                                                    |
| Q1W389                   | 52.41  | 0.00    | 9.09E-13 | Auxin-regulated protein = <i>Striga asiatica</i>                                                                                                                                                                                                        |
| C0SU68                   | 25.91  | 0.00    | 3.64E-12 | Auxin influx carrier protein, ZeLAX1 = <i>Zinnia elegans</i>                                                                                                                                                                                            |



|        |        |       |          |                                                                                                                                                                   |
|--------|--------|-------|----------|-------------------------------------------------------------------------------------------------------------------------------------------------------------------|
| B9I233 | 118.51 | 7.00  | 5.52E-12 | SAUR family protein, SAUR22 = <i>Populus trichocarpa</i>                                                                                                          |
| C0SU69 | 23.35  | 0.00  | 5.82E-11 | Auxin influx carrier protein, ZeLAX2 = <i>Zinnia elegans</i>                                                                                                      |
| B9SHS8 | 27.30  | 0.00  | 2.91E-11 | Auxin-induced protein 5NG4 = <i>Ricinus communis</i>                                                                                                              |
| Q949J8 | 21.61  | 0.00  | 4.66E-10 | Putative auxin growth promotor protein = <i>Solanum lycopersicum</i>                                                                                              |
| B9R824 | 27.77  | 0.00  | 1.16E-10 | Auxin-induced protein 5NG4 = <i>Ricinus communis</i>                                                                                                              |
| C8CBW3 | 30.78  | 0.00  | 1.19E-07 | Auxin/indole-3-acetic acid 3, IAA3 = <i>Solanum tuberosum</i>                                                                                                     |
| B9RQI4 | 16.08  | 0.00  | 3.81E-06 | Auxin-responsive protein IAA27 = <i>Nicotiana tabacum</i>                                                                                                         |
| Q2LAJ3 | 10.63  | 1.00  | 4.65E-06 | Auxin response factor 2, ARF2 = <i>Solanum lycopersicum</i>                                                                                                       |
| B9SN97 | 10.60  | 0.00  | 1.91E-06 | Indole-3-acetic acid-amido synthetase GH3.3 = <i>Ricinus communis</i>                                                                                             |
| P40691 | 15.20  | 0.00  | 6.10E-05 | Auxin-induced protein PCNT115 = <i>Nicotiana tabacum</i>                                                                                                          |
| B9RJT7 | 5.24   | 0.00  | 9.77E-04 | TRANSPORT INHIBITOR RESPONSE 1 protein = <i>Ricinus communis</i>                                                                                                  |
| Q9SHE7 | 115.38 | 53.00 | 4.52E-04 | Ubiquitin-NEDD8-like protein RUB1 [Cleaved into: Ubiquitin; NEDD8-like protein RUB1 (Ubiquitin-related protein 1) (AtRUB1)], RUB1 NEDD8 UBQ15 At1g31340 T19E23.13 |
| D7SH69 | 9.66   | 3.00  | 1.32E-03 | Whole genome shotgun sequence of line PN40024. Scaffold 0.assembly12x (Fragment) = <i>Vitis vinifera</i>                                                          |
| B9S0L2 | 3.79   | 0.00  | 3.91E-03 | Auxin response factor = <i>Ricinus communis</i>                                                                                                                   |
| B9S1E4 | 2.70   | 0.00  | 1.95E-03 | Auxin response factor = <i>Ricinus communis</i>                                                                                                                   |
| D9IA29 | 2.69   | 0.00  | 1.95E-03 | Auxin response factor 19, ARF19 = <i>Solanum lycopersicum</i>                                                                                                     |
| C7E4R3 | 4.01   | 0.00  | 7.81E-03 | Transport inhibitor response 1, TIR1 = <i>Nicotiana tabacum</i>                                                                                                   |

Abscisic acid

*Enriched in fruit*

|        |       |        |          |                                                                                                                                                                                      |
|--------|-------|--------|----------|--------------------------------------------------------------------------------------------------------------------------------------------------------------------------------------|
| Q39026 | 0.00  | 45.00  | 4.44E-16 | Mitogen-activated protein kinase 6 (AtMPK6) (MAP kinase 6), MPK6 At2g43790 F18O19.10                                                                                                 |
| Q944A7 | 0.00  | 29.00  | 2.27E-13 | Probable serine/threonine-protein kinase At4g35230                                                                                                                                   |
| P43291 | 0.00  | 39.00  | 9.09E-13 | Serine/threonine-protein kinase SRK2A (EC 2.7.11.1) (Arabidopsis protein SK1) (OST1-kinase-like 7) (SNF1-related kinase 2.4) (SnRK2.4), SRK2A ASK1 OSKL7 SNRK2.4 At1g10940 T19D16.14 |
| Q8RXD3 | 0.00  | 13.00  | 4.88E-04 | E3 ubiquitin-protein ligase AIP2 (EC 6.3.2.-) (ABI3-interacting protein 2), AIP2 At5g20910 F22D1.80                                                                                  |
| Q8LGH4 | 0.00  | 4.00   | 1.95E-03 | Cullin-4 (AtCUL4), CUL4 At5g46210 MDE13.3                                                                                                                                            |
| B9SE77 | 59.10 | 447.00 | 4.33E-29 | Abscisic stress ripening protein = <i>Ricinus communis</i>                                                                                                                           |
| A0SE34 | 0.00  | 9.00   | 3.05E-05 | 9-cis-epoxycarotenoid dioxygenase 5, NCED5 = <i>Citrus clementina</i>                                                                                                                |
| B9S5U9 | 0.00  | 5.00   | 7.81E-03 | Protein phosphatase 2c = <i>Ricinus communis</i>                                                                                                                                     |
| Q9MAM1 | 0.00  | 6.00   | 7.81E-03 | CBL-interacting serine/threonine-protein kinase 9 (EC 2.7.11.1) (SNF1-related kinase 3.12) (SOS2-like protein kinase PKS6), CIPK9 PKS6 SnRK3.12 At1g01140 F6F3.28 T25K16.13          |

*Enriched in AZ*

|        |         |        |           |                                                                                                               |
|--------|---------|--------|-----------|---------------------------------------------------------------------------------------------------------------|
| B9RNU7 | 1060.01 | 145.00 | 1.01E-205 | Protein phosphatase 2c = <i>Ricinus communis</i>                                                              |
| Q2TUW1 | 1196.07 | 20.74  | 0.00E+00  | Abscisic stress ripening-like protein = <i>Glycine max</i>                                                    |
| Q9ZUU4 | 235.29  | 5.00   | 1.24E-58  | Ribonucleoprotein At2g37220. Chloroplastic, At2g37220 F3G5.1                                                  |
| O80653 | 11.96   | 0.00   | 2.38E-07  | At1g77180/T14N5_5 (Putative nuclear protein) (Putative uncharacterized protein At1g77180), At1g77180 T14N5.5  |
| P22240 | 74.35   | 0.00   | 1.86E-09  | Abscisic acid and environmental stress-inducible protein TAS14 (Dehydrin TAS14) = <i>Solanum lycopersicum</i> |
| A9QNE7 | 9.10    | 0.00   | 1.22E-04  | ABA 8'-hydroxylase, CYP707A1 = <i>Solanum lycopersicum</i>                                                    |
| B9SVA1 | 93.10   | 13.00  | 6.79E-25  | Dihydro-lipoamide succinyltransferase component of 2-oxoglutarate dehydrogenase = <i>Ricinus communis</i>     |
| Q9M3V1 | 6.45    | 0.00   | 3.91E-03  | Protein phosphatase 2C (PP2C), pp2C1 = <i>Fagus sylvatica</i>                                                 |
| B9RK51 | 7.44    | 0.00   | 2.44E-04  | Protein phosphatase 2c = <i>Ricinus communis</i>                                                              |
| B9RVV7 | 18.84   | 0.00   | 1.53E-05  | Protein phosphatase 2c = <i>Ricinus communis</i>                                                              |
| B9R8Q9 | 22.39   | 0.00   | 1.49E-08  | Protein phosphatase 2c = <i>Ricinus communis</i>                                                              |

|                 |                                    |        |        |           |                                                                                                                                                                                                                        |
|-----------------|------------------------------------|--------|--------|-----------|------------------------------------------------------------------------------------------------------------------------------------------------------------------------------------------------------------------------|
|                 | C8KHU4                             | 36.94  | 0.00   | 1.42E-14  | Protein phosphatase 2C AHG3 homolog, SIPP2C-2 = <i>Solanum lycopersicum</i>                                                                                                                                            |
|                 | B9RJK5                             | 94.22  | 0.00   | 2.07E-25  | Protein phosphatase 2c putative = <i>Ricinus communis</i>                                                                                                                                                              |
|                 | Q5PNS9                             | 120.83 | 0.00   | 1.40E-45  | Probable protein phosphatase 2C 64 (AtPP2C64) (EC 3.1.3.16)                                                                                                                                                            |
|                 | Q9FKX4                             | 129.00 | 0.00   | 8.76E-47  | Probable protein phosphatase 2C 79 (AtPP2C79), At5g66080 K2A18.16                                                                                                                                                      |
|                 | C8KHU3                             | 93.75  | 0.00   | 5.47E-48  | Protein phosphatase 2C ABI2 homolog, SIPP2C-1 = <i>Solanum lycopersicum</i>                                                                                                                                            |
| Jasmonate       |                                    |        |        |           |                                                                                                                                                                                                                        |
|                 | <i>Enriched in fruit</i><br>B9SG47 | 0.00   | 43.00  | 5,82E-11  | Sigma factor sigb regulation protein rsbq (methyl esterase activity, MES: methyl jasmonate (MeJA) esterase activity, methyl salicylate (MeSA) esterase activity and methyl indole-3-acetate (MeIAA) esterase activity) |
|                 | O24370                             | 0      | 161.29 | 4,16E-123 | Lipoxygenase = <i>Solanum tuberosum</i>                                                                                                                                                                                |
|                 | Q39026                             | 0.00   | 45.00  | 4.44E-16  | Mitogen-activated protein kinase 6 (AtMPK6) (MAP kinase 6), MPK6 At2g43790 F18O19.10                                                                                                                                   |
|                 | <i>Enriched in AZ</i><br>B9SEM5    | 12.91  | 0.00   | 9,77E-04  | Acyl-protein thioesterase (methyl indole-3-acetate esterase activity; methyl jasmonate esterase activity; methyl salicylate esterase activity) = <i>Ricinus communis</i>                                               |
|                 | Q8S8S9                             | 16.47  | 0.00   | 1,22E-04  | At2g23620 (Putative acetone-cyanohydrin lyase), methyl indole-3-acetate esterase activity; methyl jasmonate esterase activity; methyl salicylate esterase activity; systemic acquired resistance                       |
|                 | Q8LAH7                             | 341.39 | 0.00   | 4.96E-119 | 12-oxophytodienoate reductase 1 (12-oxophytodienoate-10.11-reductase 1) (AtOPR1) (OPDA-reductase 1) (FS-AT-I), OPR1 At1g76680 F28O16.5                                                                                 |
|                 | B9RRB8                             | 83.54  | 5.00   | 1,38E-24  | 12-oxophytodienoate reductase opr = <i>Ricinus communis</i>                                                                                                                                                            |
|                 | B6D1W5                             | 44.75  | 16.00  | 5,70E-11  | Lipoxygenase = <i>Olea europaea</i>                                                                                                                                                                                    |
|                 | O24371                             | 18.23  | 0.00   | 4,44E-16  | Lipoxygenase = <i>Solanum tuberosum</i>                                                                                                                                                                                |
|                 | Q9M464                             | 13.10  | 0.00   | 4,77E-07  | Allene oxide synthase AOS = <i>Solanum lycopersicum</i>                                                                                                                                                                |
|                 | Q9SQK8                             | 22.49  | 0.00   | 2.38E-07  | Jasmonic acid 3, LEJA3 = <i>Solanum lycopersicum</i>                                                                                                                                                                   |
|                 | D8V3L7                             | 112.67 | 7.00   | 5.01E-24  | Plastid jasmonates ZIM-domain protein = <i>Hevea brasiliensis</i>                                                                                                                                                      |
|                 | A7XXZ0                             | 26.45  | 0.00   | 9.54E-07  | Jasmonate ZIM-domain protein = <i>Solanum lycopersicum</i>                                                                                                                                                             |
|                 | B0VXR3                             | 21.26  | 0.00   | 3.64E-12  | JAR1-like protein, JAR6 = <i>Nicotiana attenuata</i>                                                                                                                                                                   |
|                 | A6NAB4                             | 4.93   | 0.00   | 1.95E-03  | Myc2 bHLH protein = <i>Vitis vinifera</i>                                                                                                                                                                              |
| Cytokinins      |                                    |        |        |           |                                                                                                                                                                                                                        |
|                 | <i>Enriched in fruit</i><br>D7TDN8 | 0.00   | 5.00   | 1.95E-03  | cytokinin dehydrogenase = <i>Vitis vinifera</i>                                                                                                                                                                        |
|                 | <i>Enriched in AZ</i><br>Q3ECF7    | 8.05   | 0.00   | 4.88E-04  | Uncharacterized protein, At1g69040                                                                                                                                                                                     |
| Polyamine       |                                    |        |        |           |                                                                                                                                                                                                                        |
|                 | <i>Enriched in fruit</i><br>Q8GTQ5 | 0.00   | 12.00  | 4.88E-04  | Spermidine synthase, MdSPDS2a = <i>Malus domestica</i>                                                                                                                                                                 |
|                 | <i>Enriched in AZ</i><br>B9SIY7    | 142.06 | 0.00   | 5.47E-48  | S-adenosylmethionine decarboxylase proenzyme = <i>Ricinus communis</i>                                                                                                                                                 |
|                 | A5AFT0                             | 133.33 | 0.00   | 2.80E-45  | S-adenosylmethionine decarboxylase proenzyme = <i>Vitis vinifera</i>                                                                                                                                                   |
|                 | B9RT51                             | 20.33  | 4.00   | 1.38E-06  | Protein arginine n-methyltransferase = <i>Ricinus communis</i>                                                                                                                                                         |
|                 | B3Y023                             | 337.01 | 6.00   | 1.24E-210 | Arginine decarboxylase, PpADC = <i>Prunus persica</i>                                                                                                                                                                  |
|                 | D2K8S6                             | 52.42  | 0.00   | 5.55E-17  | Spermidine synthase = <i>Olea europaea</i>                                                                                                                                                                             |
| Brassinosteroid |                                    |        |        |           |                                                                                                                                                                                                                        |

|                |                          |        |        |          |                                                                                                                                                                                                                                                                                   |
|----------------|--------------------------|--------|--------|----------|-----------------------------------------------------------------------------------------------------------------------------------------------------------------------------------------------------------------------------------------------------------------------------------|
|                | <i>Enriched in fruit</i> |        |        |          |                                                                                                                                                                                                                                                                                   |
|                | B9RI66                   | 0.00   | 51.00  | 3.61E-34 | BRASSINOSTEROID INSENSITIVE 1-associated receptor kinase 1 = <i>Ricinus communis</i>                                                                                                                                                                                              |
|                | Q944A7                   | 0.00   | 29.00  | 2.27E-13 | Probable serine/threonine-protein kinase At4g35230                                                                                                                                                                                                                                |
|                | <i>Enriched in AZ</i>    |        |        |          |                                                                                                                                                                                                                                                                                   |
|                | Q39011                   | 252.63 | 75.00  | 7.52E-31 | Shaggy-related protein kinase eta (ASK-eta) (Protein BRASSINOSTEROID INSENSITIVE 2) (Protein ULTRACURVATA 1), ASK7 BIN2 DWF12 UCU1 At4g18710 F28A21.120                                                                                                                           |
|                | B9S318                   | 11.61  | 0.00   | 9.77E-04 | Brassinosteroid-regulated protein BRU1 = <i>Ricinus communis</i>                                                                                                                                                                                                                  |
|                | B9RAQ8                   | 5.79   | 0.00   | 4.88E-04 | BRASSINOSTEROID INSENSITIVE 1-associated receptor kinase 1 = <i>Ricinus communis</i>                                                                                                                                                                                              |
| Salicylic acid |                          |        |        |          |                                                                                                                                                                                                                                                                                   |
|                | <i>Enriched in AZ</i>    |        |        |          |                                                                                                                                                                                                                                                                                   |
|                | Q8H6W0                   | 35.33  | 3.00   | 2.44E-17 | Phenylalanine ammonia-lyase, PAL1 = <i>Coffea canephora</i>                                                                                                                                                                                                                       |
|                | O23924                   | 7.01   | 0.00   | 3.05E-05 | Phenylalanine ammonia-lyase = <i>Digitalis lanata</i>                                                                                                                                                                                                                             |
|                | Q6RYA0                   | 584.61 | 51.00  | 1.32E-98 | Salicylic acid-binding protein 2 = <i>Nicotiana tabacum</i>                                                                                                                                                                                                                       |
|                | Q9FGY9                   | 3.69   | 0.00   | 3.91E-03 | Peptide-N(4)-(N-acetyl-beta-glucosaminyl)asparagine amidase (Peptide:N-glycanase) (AtPNG1), PNG1 At5g49570 K6M13.12                                                                                                                                                               |
|                | Q8S8S9                   | 16.47  | 0.00   | 1.22E-04 | At2g23620 (Putative acetone-cyanohydrin lyase) = At2g23620                                                                                                                                                                                                                        |
|                | B9H966                   | 12.47  | 0.00   | 3.81E-06 | BOP/NPR1/NIM1-like regulatory protein = <i>Populus trichocarpa</i>                                                                                                                                                                                                                |
|                | B9S310                   | 12.42  | 0.00   | 2.38E-07 | Regulatory protein NPR1 = <i>Ricinus communis</i>                                                                                                                                                                                                                                 |
| Gibberellin    |                          |        |        |          |                                                                                                                                                                                                                                                                                   |
|                | <i>Enriched in fruit</i> |        |        |          |                                                                                                                                                                                                                                                                                   |
|                | Q9SLQ9                   | 0.00   | 139.00 | 1.06E-43 | Gibberellin 3beta-hydroxylase, Nty = <i>Nicotiana tabacum</i>                                                                                                                                                                                                                     |
|                | B9SME4                   | 0.00   | 77.00  | 1.29E-26 | Gibberellin 20-oxidase = <i>Ricinus communis</i>                                                                                                                                                                                                                                  |
|                | Q42698                   | 0.00   | 58.00  | 8.67E-19 | Geranylgeranyl pyrophosphate synthase, chloroplastic (GGPP synthase) (GGPS) ((2E.6E)-farnesyl diphosphate synthase) (Dimethylallyltranstransferase) (Farnesyl diphosphate synthase) (Farnesyltranstransferase) (Geranyltranstransferase), GGPS1 GGC1 = <i>Catharanthus roseus</i> |
|                | Q1ZYLO                   | 0.00   | 19.00  | 2.98E-08 | Geranylgeranyl reductase = <i>Olea europaea</i>                                                                                                                                                                                                                                   |
|                | <i>Enriched in AZ</i>    |        |        |          |                                                                                                                                                                                                                                                                                   |
|                | Q8S4W7                   | 35.59  | 19.00  | 4.90E-04 | DELLA protein GAI1 (Gibberellic acid-insensitive mutant protein 1) (VvGAI1), GAI1 = <i>Vitis vinifera</i>                                                                                                                                                                         |
|                | B9SST2                   | 9.29   | 0.00   | 3.05E-05 | Chitin-inducible gibberellin-responsive protein = <i>Ricinus communis</i>                                                                                                                                                                                                         |
|                | C6GMF4                   | 18.07  | 0.00   | 3.81E-06 | Gibberellin 2-oxidase, gao = <i>Nicotiana plumbaginifolia</i>                                                                                                                                                                                                                     |
|                | A4URE9                   | 27.21  | 0.00   | 3.73E-09 | Gibberellin 2-oxidase 5, GA2ox5 = <i>Nicotiana tabacum</i>                                                                                                                                                                                                                        |
|                | B9S2K0                   | 92.06  | 0.00   | 1.86E-09 | Gibberellin-regulated protein 3 = <i>Ricinus communis</i>                                                                                                                                                                                                                         |
|                | B9S2N0                   | 17.29  | 0.00   | 1.86E-09 | Chitin-inducible gibberellin-responsive protein = <i>Ricinus communis</i>                                                                                                                                                                                                         |
|                | B9SFJ8                   | 238.64 | 0.00   | 3.45E-77 | Gibberellin receptor GID1 = <i>Ricinus communis</i>                                                                                                                                                                                                                               |
|                | Q1A7S9                   | 12.85  | 3.00   | 7.54E-03 | Geranylgeranyl pyrophosphate synthase 2, GGPS2 = <i>Solanum lycopersicum</i>                                                                                                                                                                                                      |
|                | B9SVW8                   | 12.78  | 0.00   | 1.53E-05 | Geranylgeranyl pyrophosphate synthase = <i>Ricinus communis</i>                                                                                                                                                                                                                   |
|                | Q9SFB0                   | 91.25  | 0.00   | 2.80E-45 | MATE efflux family protein FRD3 (MATE citrate transporter) (Protein DTX43) (Protein FERRIC REDUCTASE DEFECTIVE 3) (AtFRD3) (Protein MANGANESE ACCUMULATOR 1), FRD3 DTX43 MAN1 At3g08040 F17A17.38 T8G24.8                                                                         |

**Table S3.** Fruit- or AZ-enriched genes encoding various vesicle trafficking proteins at the last stage of olive fruit ripening. Sequences were selected after establishing a  $P < 0.01$ . The table shows the total read count in RPKMx1000 for each gene after normalization across the two samples: fruit-pericarp and their AZ at 217 DPA.

| Uniprot ID                                  | ZA     | Fruit   | P value               | Putative ortholog                                                 | Description                                                                                     |
|---------------------------------------------|--------|---------|-----------------------|-------------------------------------------------------------------|-------------------------------------------------------------------------------------------------|
| <b>Tubulin family</b>                       |        |         |                       |                                                                   |                                                                                                 |
| <i>Enriched in fruit</i>                    |        |         |                       |                                                                   |                                                                                                 |
| D7TVZ8                                      | 0.00   | 203.53  | 6.32E <sup>-59</sup>  | AT5G12250.1, TUB6                                                 | Tubulin = <i>Vitis vinifera</i>                                                                 |
| Q3EA24                                      | 0.00   | 41.37   | 4.44E <sup>-16</sup>  | AT4G14960.1, TUA6                                                 | AT4G14960 protein                                                                               |
| B9S382                                      | 22.01  | 949.23  | 0.00E <sup>+00</sup>  | AT5G23860.2, TUB8                                                 | Tubulin beta chain = <i>Ricinus communis</i>                                                    |
| P29512                                      | 180.74 | 1812.59 | 0.00E <sup>+00</sup>  | AT5G62700.1, TUB3                                                 | Tubulin beta-2/beta-3 chain. TUBB2 TUB2<br>At5g62690 MRG21.11; TUBB3 TUB3<br>At5g62700 MRG21.12 |
| <i>Enriched in AZ</i>                       |        |         |                       |                                                                   |                                                                                                 |
| E0CNV2                                      | 6.75   | 0.00    | 3.91E <sup>-03</sup>  | AT1G50010.1, TUA2                                                 | Tubulin = <i>Vitis vinifera</i>                                                                 |
| B9SB77                                      | 41.06  | 0.00    | 2.22E <sup>-16</sup>  | AT5G12250.1, TUB6                                                 | Tubulin beta chain = <i>Ricinus communis</i>                                                    |
| <b>Actin family</b>                         |        |         |                       |                                                                   |                                                                                                 |
| <i>Enriched in fruit</i>                    |        |         |                       |                                                                   |                                                                                                 |
| B9SXZ4                                      | 0.00   | 47.22   | 1.16E <sup>-10</sup>  | AT3G53750.1, ACT3                                                 | Actin = <i>Ricinus communis</i>                                                                 |
| P53496                                      | 0.00   | 7.95    | 3.91E <sup>-03</sup>  | AT3G12110.1, ACT11                                                | Actin-11. ACT11 At3g12110 T21B14.7<br>T23B7.5 T21B14_108                                        |
| D7U423                                      | 285.13 | 834.96  | 1.85E <sup>-64</sup>  | AT5G09810.1, ACT7                                                 | Actin = <i>Vitis vinifera</i>                                                                   |
| <i>Enriched in AZ</i>                       |        |         |                       |                                                                   |                                                                                                 |
| D7SMF4                                      | 27.92  | 0.00    | 1.16E <sup>-10</sup>  | AT1G13180.1, DIS1,<br>ARP3, ATARP3                                | Actin = <i>Vitis vinifera</i>                                                                   |
| B9RR79                                      | 84.21  | 0.00    | 3.16E <sup>-30</sup>  | AT5G09810.1, ACT7                                                 | Actin = <i>Ricinus communis</i>                                                                 |
| <b>Kinesin-like protein family</b>          |        |         |                       |                                                                   |                                                                                                 |
| <i>Enriched in fruit</i>                    |        |         |                       |                                                                   |                                                                                                 |
| B9RB32                                      | 0.00   | 21.29   | 7.11E <sup>-15</sup>  | AT1G27500.1, KLRC3                                                | Kinesin light chain = <i>Ricinus communis</i>                                                   |
| <b>Small GTPase superfamily. RAB family</b> |        |         |                       |                                                                   |                                                                                                 |
| <i>Enriched in fruit</i>                    |        |         |                       |                                                                   |                                                                                                 |
| D7T2X5                                      | 0.00   | 1244.83 | 2.22E <sup>-235</sup> | AT5G47960.1<br>ATRABA4D, RABA4D,<br>RAB GTPase homolog            | RAB GTPase = <i>Vitis vinifera</i>                                                              |
| A9PCE2                                      | 0.00   | 62.01   | 3.64E <sup>-12</sup>  | AT1G09630.1,<br>ATRAB11C, ATRABA2A,<br>ATRAB-A2A, RAB-A2A,        | RAB GTPase = <i>Populus trichocarpa</i>                                                         |
| D7U0K6                                      | 0.00   | 35.17   | 9.54E <sup>-07</sup>  | AT5G45130.1, ATRAB5A,<br>ATRABF2A, RABF2A,<br>RAB5A, RHA1, ATRAB- | RAB GTPase = <i>Vitis vinifera</i>                                                              |
| B9RRP3                                      | 0.00   | 20.74   | 1.22E <sup>-04</sup>  | AT4G19640.1, ARA7,<br>ARA-7, ATRABF2B,<br>ATRAB5B, RABF2B,        | RAB GTPase = <i>Ricinus communis</i>                                                            |

|        |        |        |                       |                                                             |                                                                                                                  |
|--------|--------|--------|-----------------------|-------------------------------------------------------------|------------------------------------------------------------------------------------------------------------------|
| D7SJ99 | 0.00   | 21.40  | 1.22E <sup>-04</sup>  | AT1G18200.1, AtRABA6b, RABA6b (RabH)                        | RAB GTPase = <i>Vitis vinifera</i>                                                                               |
| B9N9L9 | 0.00   | 16.89  | 9.77E <sup>-04</sup>  | AT5G60860.1, AtRABA1f, RABA1f, RAB GTPase homolog A1F       | RAB GTPase = <i>Populus trichocarpa</i>                                                                          |
| B9IQR9 | 13.88  | 254.62 | 4.73E <sup>-35</sup>  | AT3G15060.1, AtRABA1g, RABA1g, RAB GTPase homolog A1G       | RAB GTPase = <i>Populus trichocarpa</i>                                                                          |
| A5BGY6 | 4.42   | 63.42  | 4.62E <sup>-10</sup>  | AT5G65270.1, AtRABA4a, RABA4a, RAB GTPase homolog A4A       | RAB GTPase = <i>Vitis vinifera</i>                                                                               |
| C0LSK7 | 73.57  | 724.47 | 4.71E <sup>-164</sup> | AT3G59920.1, ATGDI2, GDI2, RAB GDP dissociation inhibitor 2 | Rab GDP dissociation inhibitor. GDI = <i>Nicotiana benthamiana</i>                                               |
| Q38922 | 14.21  | 110.58 | 9.71E <sup>-12</sup>  | AT4G35860.1, ATRABB1B, ATGB2, ATRAB2C, GB2, GTP-            | ATGB2 (GTP-binding protein GB2) (Putative GTP-binding protein GB2). AT4g35860                                    |
| P28188 | 37.76  | 259.44 | 1.25E <sup>-23</sup>  | AT1G02130.1, ATRAB1B, ARA5, ARA-5, ATRABD2A, RABD2A         | Ras-related protein RABD2A (Ras-related protein ARA-5) (Ras-related protein RAB1B) (AtRab1b). RABD2A ARA-5 RAB1B |
| P92963 | 30.01  | 165.87 | 5.82E <sup>-14</sup>  | AT4G17170.1, AT-RAB2, ATRABB1C, ATRAB2A, RAB2A, RABB1C,     | At4g17170 (GTP-binding RAB2A like protein) (Rab2-like protein). rab2 AT4g17170 dl4620c At4g17170                 |
| O80501 | 30.44  | 128.20 | 2.87E <sup>-09</sup>  | AT2G44610.1, RAB6, ATRABH1B, ATRAB6A, RAB6A                 | Ras-related protein RABH1B. RABH1B RAB6A At2g44610 F16B22.10                                                     |
| B9MUT7 | 198.68 | 384.23 | 1.53E <sup>-07</sup>  | AT1G02130.1, ATRAB1B, ARA5, ARA-5, ATRABD2A, RABD2A,        | RAB GTPase = <i>Populus trichocarpa</i>                                                                          |

*Enriched in AZ*

|        |        |        |                      |                                                                         |                                                                                           |
|--------|--------|--------|----------------------|-------------------------------------------------------------------------|-------------------------------------------------------------------------------------------|
| P28186 | 310.18 | 231.48 | 4.28E <sup>-04</sup> | AT3G46060.3, ARA3, RAB GTPase homolog 8A (RAB E)                        | Ras-related protein ARA-3. ARA-3 At3g46060 F12M12_30                                      |
| D7TQ04 | 106.71 | 55.33  | 9.65E <sup>-05</sup> | AT3G18820.1, ATRABG3F, ATRAB7B, RAB71, RABG3F, RAB7B                    | RAB GTPase = <i>Vitis vinifera</i>                                                        |
| B9HUI6 | 175.78 | 71.31  | 6.47E <sup>-09</sup> | AT3G54840.1, ARA6, ATRABF1, ARA-6, ATRAB5C                              | RAB GTPase = <i>Populus trichocarpa</i>                                                   |
| Q01111 | 90.21  | 21.40  | 8.40E <sup>-09</sup> | AT1G06400.1, ARA2, ATRABA1A, ATRAB11E                                   | Ras-related protein YPT3 = <i>Nicotiana glauca</i>                                        |
| A5C9K9 | 15.50  | 0.00   | 9.77E <sup>-04</sup> | AT2G43130.1, ARA4, ATRAB11F, ATRABA5C, ARA-4, RABA5C                    | RAB GTPase = <i>Vitis vinifera</i>                                                        |
| Q43463 | 40.45  | 0.00   | 2.98E <sup>-08</sup> | AT4G09720.1, ATRABG3A, RABG3A                                           | Ras-related protein Rab7 = <i>Glycine max</i>                                             |
| O04486 | 46.08  | 0.00   | 9.31E <sup>-10</sup> | AT1G09630.1, ATRAB11C, ATRABA2A, ATRAB-A2A, RAB-A2A, AT5G03530.1, ATRAB | Ras-related protein RABA2a (Ras-related protein Rab11C). RABA2A RAB11C At1g09630 F21M12.2 |
| D7TIU1 | 50.55  | 0.00   | 1.16E <sup>-10</sup> | AT1G07410.1, ATRAB18B, ATRABC2A,                                        | RAB GTPase = <i>Vitis vinifera</i>                                                        |
| A5AR55 | 62.98  | 0.00   | 2.27E <sup>-13</sup> | AT1G07410.1, ATRABA2B, RAB-A2B, ATRAB-A2B, RABA2b                       | RAB GTPase = <i>Vitis vinifera</i>                                                        |
| A9PC79 | 117.11 | 0.00   | 6.84E <sup>-49</sup> | AT2G44100.1, ATGDI1, AT-GDI1, GDI1, guanosine nucleotide                | RAB GTPase = <i>Populus trichocarpa</i>                                                   |

**Small GTPase superfamily. ARF-like GTPase family**

*Enriched in fruit*

|        |      |       |                          |                                                        |                                                      |
|--------|------|-------|--------------------------|--------------------------------------------------------|------------------------------------------------------|
| P51824 | 0.00 | 79.52 | 2.842171E <sup>-14</sup> | AT5G14670.1, ATARFA1B, ARFA1B, ADP-ribosylation factor | ADP-ribosylation factor 1 = <i>Solanum tuberosum</i> |
|--------|------|-------|--------------------------|--------------------------------------------------------|------------------------------------------------------|

**Small GTPase superfamily. RAN family**

*Enriched in AZ*

|        |       |      |                      |                                         |                                                           |
|--------|-------|------|----------------------|-----------------------------------------|-----------------------------------------------------------|
| P54765 | 14.35 | 0.00 | 1.95E <sup>-03</sup> | AT5G55190.1, RAN3, ATRAN3, RAN GTPase 3 | GTP-binding nuclear protein Ran1 = <i>Lotus japonicus</i> |
|--------|-------|------|----------------------|-----------------------------------------|-----------------------------------------------------------|

**Small GTPase superfamily. Rho GTPase family**

*Enriched in fruit*

|        |      |        |                          |                   |                                                                                              |
|--------|------|--------|--------------------------|-------------------|----------------------------------------------------------------------------------------------|
| Q38912 | 0.00 | 106.06 | 4.336809E <sup>-19</sup> | AT4G35020.3, RAC3 | Rac-like GTP-binding protein ARAC3 (GTPase protein ROP6). ARAC3 RAC1 ROP6 At4g35020 M4E13.80 |
|--------|------|--------|--------------------------|-------------------|----------------------------------------------------------------------------------------------|

*Enriched in AZ*

|        |        |      |                          |                            |                                                                                     |
|--------|--------|------|--------------------------|----------------------------|-------------------------------------------------------------------------------------|
| D7U1Z9 | 102.82 | 2.92 | 1.515424E <sup>-59</sup> | AT5G27540.2, MIRO1         | Mitochondrial Rho GTPase = <i>Vitis vinifera</i>                                    |
| Q6EP31 | 213.19 | 0.00 | 7.34684E <sup>-40</sup>  | AT1G75840.1, ARAC5, ATGP3, | Rac-like GTP-binding protein 5 (GTPase protein RacD) (OsRac5) = <i>Oryza sativa</i> |

**Small GTPase superfamily. SAR1 family**

*Enriched in fruit*

|        |        |         |                         |                                            |                                                            |
|--------|--------|---------|-------------------------|--------------------------------------------|------------------------------------------------------------|
| O04834 | 407.59 | 1017.27 | 2.92844E <sup>-29</sup> | AT4G02080.1, ASAR1, ATSARA1C, ATSAR2, SAR: | GTP-binding protein SAR1A. SAR1A At4g02080 T10M13.9 AGAA.4 |
|--------|--------|---------|-------------------------|--------------------------------------------|------------------------------------------------------------|

**Dynamin family**

*Enriched in fruit*

|        |      |       |                      |                                                    |                                      |
|--------|------|-------|----------------------|----------------------------------------------------|--------------------------------------|
| B9MVC5 | 0.00 | 17.51 | 2.33E <sup>-10</sup> | AT3G60190.1, ADL4, ADLP2, EDR3, DRP1E, ADL1E, DL1E | Dynamin = <i>Populus trichocarpa</i> |
|--------|------|-------|----------------------|----------------------------------------------------|--------------------------------------|

*Enriched in AZ*

|        |       |      |                      |                                                    |                                   |
|--------|-------|------|----------------------|----------------------------------------------------|-----------------------------------|
| B9SRI2 | 11.32 | 0.00 | 1.49E <sup>-08</sup> | AT3G19720.1, ARC5, DRP5B                           | Dynamin = <i>Ricinus communis</i> |
| D7TGM4 | 10.14 | 0.00 | 3.73E <sup>-09</sup> | AT1G59610.1, ADL3, CF1, DRP2B, DL3                 | Dynamin = <i>Vitis vinifera</i>   |
| D7SN01 | 12.88 | 0.00 | 7.28E <sup>-12</sup> | AT1G10290.1, ADL6, DRP2A                           | Dynamin = <i>Vitis vinifera</i>   |
| D7U670 | 17.69 | 0.00 | 8.88E <sup>-16</sup> | AT4G33650.1, ADL2, DRP3A                           | Dynamin = <i>Vitis vinifera</i>   |
| A5CA51 | 32.22 | 0.00 | 2.17E <sup>-19</sup> | AT3G60190.1, ADL4, ADLP2, EDR3, DRP1E, ADL1E, DL1E | Dynamin = <i>Vitis vinifera</i>   |

**V-type ATPase family**

*Enriched in fruit*

|        |        |         |                      |                                                                |                                                                                                                                                                                                                                                                                                                 |
|--------|--------|---------|----------------------|----------------------------------------------------------------|-----------------------------------------------------------------------------------------------------------------------------------------------------------------------------------------------------------------------------------------------------------------------------------------------------------------|
| D7SX66 | 0.00   | 25.13   | 2.38E <sup>-07</sup> | AT3G28715.1, ATPase, V0/A0 complex, subunit C/D                | V-type ATPase = <i>Vitis vinifera</i>                                                                                                                                                                                                                                                                           |
| Q9FLN5 | 28.57  | 147.61  | 4.13E <sup>-05</sup> | AT5G55290.2, ATPase, V0 complex, subunit E                     | AT5G55290 protein (AT5g55290/MCO15_24) (Genomic DNA. chromosome 5. P1 clone:MCO15) AT5G55290 At5g55290 V-type proton ATPase 16 kDa proteolipid subunit c1/c3/c5 (V-ATPase 16 kDa proteolipid subunit c1/c3/c5) (Vacuolar H(+)-ATPase H+-transporting ATPase-like protein (Vacuolar membrane ATPase subunit c")) |
| P59227 | 516.26 | 1674.79 | 3.12E <sup>-60</sup> | AT4G34720.1, VHA-C1 AVA-P1 AVAP1                               |                                                                                                                                                                                                                                                                                                                 |
| Q9SZY7 | 57.40  | 120.37  | 2.88E <sup>-03</sup> | At4g34720 T4L20.300; VHA-C3AVA-P1 , VHA-C1, ATVHA-C1   ATPase, |                                                                                                                                                                                                                                                                                                                 |
| D7T7L1 | 40.02  | 69.70   | 4.16E <sup>-03</sup> | AT3G42050.1, vacuolar ATP synthase subunit H family protein    | V-type ATPase = <i>Vitis vinifera</i>                                                                                                                                                                                                                                                                           |

*Enriched in AZ*

|        |        |        |                      |                                                     |                                       |
|--------|--------|--------|----------------------|-----------------------------------------------------|---------------------------------------|
| D7SS06 | 252.00 | 190.47 | 1.48E <sup>-07</sup> | AT1G78900.2, VHA-A, vacuolar ATP synthase subunit A | V-type ATPase = <i>Vitis vinifera</i> |
|--------|--------|--------|----------------------|-----------------------------------------------------|---------------------------------------|

|                                |        |        |        |                       |                                                             |                                                                                                                              |
|--------------------------------|--------|--------|--------|-----------------------|-------------------------------------------------------------|------------------------------------------------------------------------------------------------------------------------------|
| <b>Syntaxin/t-SNARE family</b> | Q6KAA4 | 117.94 | 35.89  | 7.67E <sup>-06</sup>  | AT4G02620.1, vacuolar ATPase subunit F family protein       | V-type proton ATPase subunit F = <i>Oryza sativa</i>                                                                         |
|                                | Q9LJ15 | 494.77 | 50.33  | 6.20E <sup>-107</sup> | AT3G28710.1, ATPase, V0/A0 complex, subunit C/D             | V-type proton ATPase subunit d1 (V-ATPase subunit d1) (Vacuolar H(+)-ATPase subunit d. VHA-D1 At3g28710 MZN14.21             |
|                                | Q9LX65 | 7.55   | 0.00   | 9.77E <sup>-04</sup>  | AT3G42050.1, vacuolar ATP synthase subunit H family protein | V-type proton ATPase subunit H (V-ATPase subunit H) (Vacuolar H(+)-ATPase subunit H) (Vacuolar proton pump subunit H). VHA-H |
|                                | B9S253 | 48.57  | 0.00   | 6.78E <sup>-21</sup>  | AT3G42050.1, vacuolar ATP synthase subunit H family protein | Vacuolar ATP synthase subunit h = <i>Ricinus communis</i>                                                                    |
|                                | Q8RU33 | 242.16 | 0.00   | 6.75E <sup>-80</sup>  | AT3G28715.1, ATPase, V0/A0 complex, subunit C/D             | Probable V-type proton ATPase subunit d (V-ATPase subunit d) (Vacuolar proton pump subunit d) = <i>Oryza sativa</i>          |
| <i>Enriched in fruit</i>       |        |        |        |                       |                                                             |                                                                                                                              |
|                                | D7U8L0 | 0.00   | 13.02  | 4.88E <sup>-04</sup>  | AT5G08080.1, SYP132, ATSYP132   syntaxin of plants 132      | Syntaxin = <i>Vitis vinifera</i>                                                                                             |
|                                | B9SUS4 | 0.00   | 8.65   | 7.81E <sup>-03</sup>  | AT5G08080.1, SYP132, ATSYP132   syntaxin of plants 132      | Syntaxin = <i>Ricinus communis</i>                                                                                           |
| <i>Enriched in AZ</i>          |        |        |        |                       |                                                             |                                                                                                                              |
| <b>Others families</b>         | B9T2S1 | 243.53 | 108.06 | 7.08E <sup>-11</sup>  | AT5G06320.1, NHL3   NDR1/HIN1-like 3                        | Syntaxin = <i>Ricinus communis</i>                                                                                           |
|                                | B9MU58 | 26.76  | 0.00   | 2.38E <sup>-07</sup>  | AT5G46860.1, VAM3, ATVAM3, SYP22, ATSYP22, SGR3             | Syntaxin = <i>Populus trichocarpa</i>                                                                                        |
|                                | B9SDJ9 | 136.07 | 0.00   | 9.18E <sup>-41</sup>  | AT3G11820.1, SYP121, AT-SYR1, ATSYP121, SYR1, ATSYR1, PEN1  | Syntaxin = <i>Ricinus communis</i>                                                                                           |
|                                | B9S5U3 | 0.50   | 0.00   | 3.91E <sup>-03</sup>  |                                                             | Midasin = <i>Ricinus communis</i>                                                                                            |
|                                | Q9SUT9 | 44.28  | 0.00   | 7.28E <sup>-12</sup>  | At4g11220 F8L21.10                                          | Reticulon-like protein B2 (AtRTNLB2) (VirB2-interacting protein 2). RTNLB2 BTI2 At4g11220 F8L21.10                           |

**Table S4.** Fruit- or AZ-enriched genes encoding various transport proteins at the last stage of olive fruit ripening. Sequences were selected after establishing a P<0.01. The table shows the total read count in RPKMx1000 for each gene after normalization across the two samples: fruit-pericarp and their AZ at 217 DPA.

|                          | Uniprot ID | ZA     | Fruit  | P value   | Description                                                                        |
|--------------------------|------------|--------|--------|-----------|------------------------------------------------------------------------------------|
| <i>Sugar transporter</i> |            |        |        |           |                                                                                    |
|                          | D7SH34     | 0.00   | 696.00 | 1,50E-158 | Sugar transporter= <i>Vitis vinifera</i>                                           |
|                          | D7UDD8     | 0.00   | 185.00 | 1,10E-103 | Major facilitator superfamily, Sugar transporter family = <i>Vitis vinifera</i>    |
|                          | Q3E6T0     | 0.00   | 156.00 | 4,38E-46  | Probable sugar phosphate/phosphate translocator At5g25400                          |
|                          | B9SJK9     | 0.00   | 102.00 | 1,06E-22  | Sugar transporter = <i>Ricinus communis</i>                                        |
|                          | D7U4Q9     | 0.00   | 56.00  | 6,94E-18  | Sugar transporter = <i>Vitis vinifera</i>                                          |
|                          | B9SBS6     | 0.00   | 43.00  | 5,68E-14  | CMP-sialic acid transporter = <i>Ricinus communis</i>                              |
|                          | B9RM94     | 3.68   | 71.00  | 9,08E-13  | Sugar transporter = <i>Ricinus communis</i>                                        |
|                          | B9R8S3     | 51.87  | 470.00 | 4,59E-170 | Sugar transporter = <i>Ricinus communis</i>                                        |
|                          | Q68BJ8     | 285.36 | 386.00 | 5,01E-04  | Sorbitol transporter = <i>Malus domestica</i>                                      |
|                          | D7TBL1     | 17.08  | 2.00   | 1,52E-05  | Monosaccharide transporter = <i>Vitis vinifera</i>                                 |
|                          | B9RP33     | 6.55   | 0.00   | 7,81E-03  | UDP-sugar transporter = <i>Ricinus communis</i>                                    |
|                          | B9RTN4     | 4.52   | 0.00   | 7,81E-03  | Sugar transporter = <i>Ricinus communis</i>                                        |
|                          | Q9SX48     | 4.51   | 0.00   | 7,81E-03  | Sugar transport protein 9 (Hexose transporter 9) STP9 At1g50310 F14I3.9            |
|                          | D7TJV0     | 11.49  | 0.00   | 3,91E-03  | Sugar transporter = <i>Vitis vinifera</i>                                          |
|                          | Q9SBA7     | 6.57   | 0.00   | 9,77E-04  | Sugar transport protein 8 (Hexose transporter 8) STP8 At5g26250 F9D12.9 T19G15.100 |
|                          | D7T6L7     | 8.37   | 0.00   | 4,88E-04  | ERD6-like transporter = <i>Vitis vinifera</i>                                      |
|                          | Q94EI9     | 11.76  | 0.00   | 2,44E-04  | Sugar phosphate/phosphate translocator At3g14410                                   |
|                          | Q07423     | 9.8    | 0.00   | 3,05E-05  | Hexose carrier protein HEX6 = <i>Ricinus communis</i>                              |
|                          | B9RTZ7     | 45.28  | 0.00   | 5,29E-23  | Sugar transporter = <i>Ricinus communis</i>                                        |
|                          | B9SZL0     | 85.85  | 0.00   | 1,84E-40  | Sugar transporter = <i>Ricinus communis</i>                                        |
|                          | B9RZB4     | 192.95 | 0.00   | 2,34E-97  | Sugar transporter= <i>Ricinus communis</i>                                         |
| <i>N transporter</i>     |            |        |        |           |                                                                                    |
|                          | D7U9B7     | 0.00   | 115.00 | 2,69E-101 | Oligopeptide transporter = <i>Vitis vinifera</i>                                   |
|                          | D7TNF6     | 0.00   | 70.00  | 1,50E-36  | Oligopeptide transporter = <i>Vitis vinifera</i>                                   |
|                          | A5C8T7     | 0.00   | 44.00  | 5,29E-23  | Oligopeptide transporter = <i>Vitis vinifera</i>                                   |
|                          | D7U9C1     | 0.00   | 19.00  | 7,28E-12  | Oligopeptide transporter = <i>Vitis vinifera</i>                                   |
|                          | D7T4G2     | 0.00   | 12.00  | 9,54E-07  | Oligopeptide transporter = <i>Vitis vinifera</i>                                   |
|                          | D7SLW7     | 0.00   | 7.00   | 2,44E-04  | Oligopeptide transporter = <i>Vitis vinifera</i>                                   |
|                          | O80436     | 0.00   | 7.00   | 9,77E-04  | Peptide/nitrate transporter At2g38100                                              |
|                          | D7U9B1     | 1.39   | 69.00  | 3,33E-112 | Oligopeptide transporter = <i>Vitis vinifera</i>                                   |
|                          | B9SM54     | 6.45   | 23.00  | 1,45E-03  | Amino acid transporter = <i>Ricinus communis</i>                                   |
|                          | D7T9Q9     | 14.25  | 45.00  | 9,74E-08  | Amino acid transporter = <i>Vitis vinifera</i>                                     |
|                          | B9S4A3     | 23.65  | 61.00  | 3,30E-05  | Amino acid transporter = <i>Ricinus communis</i>                                   |



|        |        |      |           |                                                                                                                        |
|--------|--------|------|-----------|------------------------------------------------------------------------------------------------------------------------|
| D7TL72 | 17.23  | 9.00 | 9,40E-03  | Amino acid transporter = <i>Vitis vinifera</i>                                                                         |
| Q9ZTX4 | 42.53  | 4.00 | 8,45E-17  | Oligopeptide transporter, LeOPT1 = <i>Solanum lycopersicum</i>                                                         |
| B9RBN4 | 103.03 | 8.00 | 9,43E-31  | Amino acid transporter = <i>Ricinus communis</i>                                                                       |
| D7TJT3 | 1.86   | 0.00 | 7,81E-03  | Oligopeptide transporter = <i>Vitis vinifera</i>                                                                       |
| B9RD13 | 4.69   | 0.00 | 3,91E-03  | Cationic amino acid transporter = <i>Ricinus communis</i>                                                              |
| B9S4A2 | 6.06   | 0.00 | 3,91E-03  | Amino acid transporter = <i>Ricinus communis</i>                                                                       |
| B9T755 | 2.35   | 0.00 | 3,91E-03  | Peptide transporter = <i>Ricinus communis</i>                                                                          |
| Q9SRK7 | 5.76   | 0.00 | 9,77E-04  | Adenine/guanine permease AZG1 (AzgA-homolog protein) (Protein AZAGUANINE RESISTANT 1) (AtAzg1), AZG1 At3g10960 F9F8.22 |
| B9S1L4 | 7.54   | 0.00 | 4,88E-04  | Amino acid transporter = <i>Ricinus communis</i>                                                                       |
| D7T9A4 | 4.14   | 0.00 | 4,88E-04  | Oligopeptide transporter = <i>Vitis vinifera</i>                                                                       |
| Q9LFX9 | 6.94   | 0.00 | 2,44E-04  | Nitrate transporter 1.6                                                                                                |
| B9RYS3 | 6.14   | 0.00 | 6,10E-05  | Oligopeptide transporter = <i>Ricinus communis</i>                                                                     |
| B9SI71 | 8.81   | 0.00 | 7,63E-06  | Cationic amino acid transporter = <i>Ricinus communis</i>                                                              |
| B9SKU5 | 10.22  | 0.00 | 3,81E-06  | Cationic amino acid transporter = <i>Ricinus communis</i>                                                              |
| Q9ZPR7 | 18.80  | 0.00 | 2,38E-07  | Ureide permease 1 (AtUPS1), UPS1 At2g03590 F19B11.4                                                                    |
| B9RPK4 | 11.43  | 0.00 | 1,19E-07  | Oligopeptide transporter = <i>Ricinus communis</i>                                                                     |
| A5BUN8 | 13.76  | 0.00 | 1,49E-08  | Oligopeptide transporter = <i>Vitis vinifera</i>                                                                       |
| B9RAN2 | 18.32  | 0.00 | 9,31E-10  | Purine permease = <i>Ricinus communis</i>                                                                              |
| B9SJX4 | 18.94  | 0.00 | 9,31E-10  | GABA-specific permease = <i>Ricinus communis</i>                                                                       |
| Q7XAK5 | 19.57  | 0.00 | 1,46E-11  | Nitrate transporter = <i>Prunus persica</i>                                                                            |
| B9R7I7 | 23.11  | 0.00 | 1,82E-12  | Purine permease = <i>Ricinus communis</i>                                                                              |
| B9T6M4 | 13.08  | 0.00 | 2,84E-14  | Peptide transporter = <i>Ricinus communis</i>                                                                          |
| B9S275 | 41.31  | 0.00 | 3,23E-27  | Oligopeptide transporter = <i>Ricinus communis</i>                                                                     |
| D7SZL3 | 54.05  | 0.00 | 1,58E-30  | Oligopeptide transporter = <i>Vitis vinifera</i>                                                                       |
| B9R934 | 162.79 | 0.00 | 6,14E-92  | Nitrate transporter = <i>Ricinus communis</i>                                                                          |
| D7SIH4 | 110.16 | 0.00 | 8,52E-109 | Oligopeptide transporter = <i>Vitis vinifera</i>                                                                       |

#### Aquaporin

|        |        |        |          |                                                                                                                          |
|--------|--------|--------|----------|--------------------------------------------------------------------------------------------------------------------------|
| Q08733 | 0.00   | 61.00  | 8,88E-16 | Aquaporin PIP1-3 (AtPIP1;3) (Plasma membrane intrinsic protein 1c) (PIP1c) (TMP-B), PIP1-3 PIP1C TMPB At1g01620 F22L4.16 |
| B9RS20 | 0.00   | 38.00  | 7,45E-09 | Tonoplast intrinsic protein, MIP/aquaporin family = <i>Ricinus communis</i>                                              |
| C5IX25 | 16.61  | 225.00 | 2,30E-37 | Plasma intrinsic protein 2;5, MIP/aquaporin family = <i>Juglans regia</i>                                                |
| Q0MX13 | 26.28  | 319.00 | 3,33E-50 | Aquaporin PIP2;2 = <i>Vitis vinifera</i>                                                                                 |
| A9P9G2 | 148.45 | 729.00 | 4,38E-61 | Aquaporin, MIP family, TIP subfamily = <i>Populus trichocarpa</i>                                                        |
| C5IX20 | 27.87  | 84.00  | 1,18E-05 | Plasma intrinsic protein 1;1, MIP/aquaporin family = <i>Juglans regia</i>                                                |
| B5KGP0 | 361.00 | 181.00 | 1,07E-13 | Small basic intrinsic protein 1-2, MIP/aquaporin family = <i>Olea europaea</i>                                           |
| B9S0M0 | 84.49  | 36.00  | 5,05E-06 | Aquaporin PIP2.2 = <i>Ricinus communis</i>                                                                               |

|                          |        |        |        |          |                                                                                                                |
|--------------------------|--------|--------|--------|----------|----------------------------------------------------------------------------------------------------------------|
|                          | A9PFE8 | 8.13   | 0.00   | 7,81E-03 | Aquaporin, MIP family, PIP subfamily = <i>Populus trichocarpa</i>                                              |
|                          | Q9AVB3 | 60.39  | 0.00   | 1,11E-16 | Plasma membrane intrinsic protein 2-2, Py-PIP2-2 = <i>Pyrus communis</i>                                       |
|                          | C8CE50 | 117.24 | 0.00   | 2,47E-32 | Aquaporin, PIP1;1 = <i>Fragaria ananassa</i>                                                                   |
| <i>ABC transporter</i>   |        |        |        |          |                                                                                                                |
|                          | B9RUV8 | 0.00   | 35.00  | 1,06E-22 | ATP-dependent transporter, ABC transporter = <i>Ricinus communis</i>                                           |
|                          | B9N856 | 125.69 | 203.00 | 3,07E-06 | ABC transporter family protein = <i>Populus trichocarpa</i>                                                    |
|                          | B9R7N6 | 6.9    | 0.00   | 9,77E-04 | Multidrug resistance pump = <i>Ricinus communis</i>                                                            |
|                          | B9RIN7 | 4.28   | 0.00   | 1,91E-06 | Multidrug resistance-associated protein 1, 3 (Mrp1, 3), abc-transporter = <i>Ricinus communis</i>              |
|                          | B9R6R0 | 15.78  | 0.00   | 2,98E-08 | Multidrug resistance pump = <i>Ricinus communis</i>                                                            |
|                          | B9S7S7 | 35.02  | 0.00   | 1,86E-09 | Phosphate abc transporter = <i>Ricinus communis</i>                                                            |
|                          | B9T0A5 | 19.66  | 0.00   | 1,14E-13 | ATP-binding cassette transporter = <i>Ricinus communis</i>                                                     |
|                          | D7UBX7 | 10.57  | 0.00   | 2,84E-14 | ABC transporter = <i>Vitis vinifera</i>                                                                        |
|                          | B9RXM4 | 67.97  | 0.00   | 6,16E-33 | Multidrug resistance pump = <i>Ricinus communis</i>                                                            |
|                          | B9T6V3 | 71.92  | 0.00   | 6,16E-33 | Multidrug resistance pump = <i>Ricinus communis</i>                                                            |
|                          | B9RXM3 | 71.09  | 0.00   | 1,54E-33 | Multidrug resistance pump = <i>Ricinus communis</i>                                                            |
|                          | D7T9B7 | 122.29 | 0.00   | 1,73E-77 | ABC transporter = <i>Vitis vinifera</i>                                                                        |
| <i>Metal transporter</i> |        |        |        |          |                                                                                                                |
|                          | A5C1P9 | 0.00   | 354.00 | 1,22E-92 | Metal ion transporter = <i>Vitis vinifera</i>                                                                  |
|                          | B9T4M0 | 0.00   | 111.00 | 9,18E-35 | Urease accessory protein ureH = <i>Ricinus communis</i>                                                        |
|                          | B9RAC5 | 0.00   | 46.00  | 1,42E-14 | Metal ion binding protein = <i>Ricinus communis</i>                                                            |
|                          | E0CUG6 | 0.00   | 136.00 | 1,14E-13 | Metal ion transporter = <i>Vitis vinifera</i>                                                                  |
|                          | D7TBR6 | 0.00   | 82.00  | 2,33E-10 | Metal ion transporter = <i>Vitis vinifera</i>                                                                  |
|                          | B9RFA4 | 0.00   | 10.00  | 9,77E-04 | Chloroplast-targeted copper chaperone, Metal ion transporter = <i>Ricinus communis</i>                         |
|                          | D7SND2 | 0.00   | 9.00   | 7,81E-03 | Metal ion transporter = <i>Vitis vinifera</i>                                                                  |
|                          | A1YIQ6 | 16.19  | 150.00 | 5,93E-27 | Zinc transporter = <i>Solanum lycopersicum</i>                                                                 |
|                          | Q9FJH5 | 95.41  | 240.00 | 3,50E-11 | At5g60800 (Gb AAC98457.1) Metal ion transporter                                                                |
|                          | O82089 | 190.08 | 69.00  | 4,76E-07 | AT3g56240/F18O21_200 (Copper homeostasis factor)                                                               |
|                          | D7TQQ5 | 184.54 | 57.00  | 3,91E-20 | Metal ion transporter = <i>Vitis vinifera</i>                                                                  |
|                          | A5C6S4 | 79.57  | 9.00   | 5,65E-08 | Metal ion transporter = <i>Vitis vinifera</i>                                                                  |
|                          | Q6R3K6 | 65.09  | 2.00   | 6,56E-37 | Metal-nicotianamine transporter YSL6 (Protein YELLOW STRIPE LIKE 6) (AtYSL6), YSL6 At3g27020 MOJ10.9           |
|                          | D7TV62 | 17.41  | 0.00   | 7,81E-03 | Metal ion transporter = <i>Vitis vinifera</i>                                                                  |
|                          | A5APE7 | 21.13  | 0.00   | 1,95E-03 | Metal ion transporter = <i>Vitis vinifera</i>                                                                  |
|                          | Q8RY06 | 6.91   | 0.00   | 1,95E-03 | Metal ion transmembrane transporter At2g04305/T23O15.7                                                         |
|                          | D7T3V8 | 9.42   | 0.00   | 9,77E-04 | Metal ion transporter = <i>Vitis vinifera</i>                                                                  |
|                          | Q6R3L0 | 4.95   | 0.00   | 9,77E-04 | Metal-nicotianamine transporter YSL1 (Protein YELLOW STRIPE LIKE 1) (AtYSL1), YSL1 At4g24120 T19F6.8 T19F6.110 |

|                             |        |        |        |           |                                                                                                                                                    |
|-----------------------------|--------|--------|--------|-----------|----------------------------------------------------------------------------------------------------------------------------------------------------|
|                             | A5BBJ4 | 13.00  | 0.00   | 4,88E-04  | Metal ion transporter = <i>Vitis vinifera</i>                                                                                                      |
|                             | D7T8F6 | 7.59   | 0.00   | 4,88E-04  | Metal ion transporter = <i>Vitis vinifera</i>                                                                                                      |
|                             | D7UCD8 | 22.36  | 0.00   | 4,88E-04  | Metal ion transporter = <i>Vitis vinifera</i>                                                                                                      |
|                             | B9TAG3 | 189.39 | 0.00   | 6,62E-24  | Metal ion binding protein = <i>Ricinus communis</i>                                                                                                |
| <i>Nutrient transporter</i> |        |        |        |           |                                                                                                                                                    |
|                             | B9SIK0 | 0.00   | 350.00 | 1,67E-99  | 2-oxoglutarate/malate translocator, chloroplast = <i>Ricinus communis</i>                                                                          |
|                             | Q9FMF7 | 0.00   | 198.00 | 3,92E-94  | 2-oxoglutarate/malate translocator (At5g64290) (Putative 2-oxoglutarate/malate translocator) (Putative 2-oxoglutarate/malate translocator protein) |
|                             | B9RID8 | 0.00   | 89.00  | 3,30E-42  | 2-oxoglutarate/malate translocator, chloroplast = <i>Ricinus communis</i>                                                                          |
|                             | B9RUG9 | 0.00   | 37.00  | 8,88E-16  | Cation efflux protein/ zinc transporter = <i>Ricinus communis</i>                                                                                  |
|                             | B9SH00 | 0.00   | 8.00   | 9,54E-07  | Cation-transporting atpase plant = <i>Ricinus communis</i>                                                                                         |
|                             | Q8GWP3 | 0.00   | 44.00  | 3,81E-06  | Copper transporter 6 (AtCOPT6), COPT6 At2g26975                                                                                                    |
|                             | B9SJ59 | 0.00   | 7.00   | 2,44E-04  | Sulfate transporter = <i>Ricinus communis</i>                                                                                                      |
|                             | B9RR93 | 0.00   | 28.00  | 4,88E-04  | Copper transporter = <i>Ricinus communis</i>                                                                                                       |
|                             | B9RH84 | 138.90 | 358.00 | 9,13E-151 | Phosphatidylinositol transporter = <i>Ricinus communis</i>                                                                                         |
|                             | B9T1L0 | 3.45   | 30.00  | 4,52E-15  | Cation-transporting atpase plant = <i>Ricinus communis</i>                                                                                         |
|                             | B9RWZ4 | 1.86   | 10.00  | 4,13E-05  | Cation-transporting atpase plant = <i>Ricinus communis</i>                                                                                         |
|                             | B9RUY1 | 12.93  | 30.00  | 6,22E-03  | Sulfate transporter = <i>Ricinus communis</i>                                                                                                      |
|                             | B9RWT3 | 17.93  | 3.00   | 6,62E-05  | Ammonium transporter = <i>Ricinus communis</i>                                                                                                     |
|                             | B9RHZ9 | 56.74  | 7.00   | 2,12E-13  | Thiosulfate sulfertansferase = <i>Ricinus communis</i>                                                                                             |
|                             | B9STR6 | 17.23  | 2.00   | 3,11E-08  | Cyclic nucleotide-gated ion channel = <i>Ricinus communis</i>                                                                                      |
|                             | B9R709 | 18.20  | 2.00   | 5,91E-12  | Cation-transporting atpase plant = <i>Ricinus communis</i>                                                                                         |
|                             | B9S7C7 | 3.18   | 0.00   | 7,81E-03  | Potassium transporter = <i>Ricinus communis</i>                                                                                                    |
|                             | B9SCE3 | 2.33   | 0.00   | 7,81E-03  | Copper-transporting atpase p-type = <i>Ricinus communis</i>                                                                                        |
|                             | Q9SYG9 | 5.18   | 0.00   | 9,77E-04  | Cation/calcium exchanger 4 (AtCCX4) (Protein CATION CALCIUM EXCHANGER 4), CCX4 At1g54115 F1511.21                                                  |
|                             | B9RKV6 | 3.61   | 0.00   | 4,88E-04  | Cation-transporting atpase plant = <i>Ricinus communis</i>                                                                                         |
|                             | A8D009 | 17.81  | 0.00   | 6,10E-05  | Ferritin = <i>Ricinus communis</i>                                                                                                                 |
|                             | B9SZW3 | 14.30  | 0.00   | 1,19E-07  | Inorganic phosphate transporter = <i>Ricinus communis</i>                                                                                          |
|                             | Q93YH1 | 13.18  | 0.00   | 4,77E-07  | Sodium/hydrogen exchanger, NHX2 = <i>Solanum lycopersicum</i>                                                                                      |
|                             | B9SI63 | 26.89  | 0.00   | 1,78E-15  | Sodium/potassium/calcium exchanger 6 = <i>Ricinus communis</i>                                                                                     |
|                             | B9RUZ6 | 24.88  | 0.00   | 4,44E-16  | Boron transporter = <i>Ricinus communis</i>                                                                                                        |
|                             | Q1JRA3 | 31.66  | 0.00   | 2,22E-16  | Sodium/hydrogen exchanger, NHX3 = <i>Solanum lycopersicum</i>                                                                                      |
|                             | D0V1M5 | 34.08  | 0.00   | 1,39E-17  | Sodium/hydrogen exchanger = <i>Vitis vinifera</i>                                                                                                  |
|                             | Q9SV13 | 30.9   | 0.00   | 2,17E-19  | Sulfate transporter 3.1 (AST12) (AtST1), SULTR3;1 ST1 At3g51895 F4F15.10 ATEM1.15                                                                  |
|                             | B9RGU8 | 35.33  | 0.00   | 2,58E-26  | Potassium transporter = <i>Ricinus communis</i>                                                                                                    |
|                             | B9SF53 | 62.81  | 0.00   | 4,93E-32  | Inorganic phosphate transporter = <i>Ricinus communis</i>                                                                                          |

|        |        |      |           |                                                                                                                                                                                |
|--------|--------|------|-----------|--------------------------------------------------------------------------------------------------------------------------------------------------------------------------------|
| B9SPI0 | 71.43  | 0.00 | 3,85E-34  | Nitrate transporter = <i>Ricinus communis</i>                                                                                                                                  |
| B9RIV7 | 70.92  | 0.00 | 9,40E-38  | Arsenite transport protein = <i>Ricinus communis</i>                                                                                                                           |
| Q1L4E2 | 158.84 | 0.00 | 1,15E-41  | Ferritin = <i>Malus domestica</i>                                                                                                                                              |
| Q9SFB0 | 91.25  | 0.00 | 2,80E-45  | MATE efflux family protein FRD3 (MATE citrate transporter) (Protein DTX43) (Protein FERRIC REDUCTASE DEFECTIVE 3) (AtFRD3) (Protein MANGANESE ACCUMULATOR 4) (FRD3 DTX43 MAN4) |
| B9SF95 | 614.34 | 0.00 | 7,75E-267 | Nitrate transporter = <i>Ricinus communis</i>                                                                                                                                  |

**Table S5.** PCR-primers used in this study.

| Primer    | Sequence                     | Gene (Uniprot ID) |
|-----------|------------------------------|-------------------|
| ERF5-F    | 5'-TTCATCCAGCATCGGAGTAAC-3'  | ERF5 (Q9SXS8)     |
| ERF5-R    | 5'-GAGGGCTGTGCATGCAAGCTC-3'  |                   |
| ERF4-F    | 5'-GTTAATGGAGTTAAGGATAAG -3' | ERF4 (Q9LW49)     |
| ERF4-R    | 5'-TCAAGCTCAACCGGCGTTG-3'    |                   |
| SnRK2.4-F | 5'-TACCGGAGAGAAAACCCAACC-3'  | SnRK2.4 (P43291)  |
| SnRK2.4-R | 5'-TATGCCTCCCAACCAAAGCC-3'   |                   |
| NPR1-F    | 5'-CTGAATAATGTGCATATCCG-3'   | NPR1 (B9H966)     |
| NPR1-R    | 5'-ATGCTCATTCTTTGTTAGTTG-3'  |                   |
| JAR1-F    | 5'-AACATCGACAAGAATACGGAG-3'  | JAR1 (B0VXR3)     |
| JAR1-R    | 5'-GTCTAAACGGTTGCAGCATTG-3'  |                   |
